# Supplementary material for: Design, synthesis and potent anti-pancreatic cancer activity of new pyrazole derivatives bearing chalcone, thiazole and thiadiazole moieties: gene expression, DNA fragmentation, cell cycle arrest and SAR
Source: Royal Society of Chemistry journal article supplement (doi:10.1039/d4ra03005b), 2024-01-01
Supplement: d4ra03005b1.pdf [file d4ra03005b1.pdf]

## **Synthesis and potent anti-pancreatic cancer activity of new pyrazole derivatives bearing chalcone, thiazol and thiadiazol moieties: Gene expression, DNA fragmentation and SAR**

Monica G. Kamel<sup>1</sup>, Farid M. Sroor<sup>2,\*</sup>, Mahmoud KH. Hanafy<sup>3</sup>, Karima F. Mahrous<sup>4</sup>, Hamdi M. Hassaneen<sup>1,\*</sup>

1. Department of Chemistry, Faculty of Science, Cairo University, Giza, Egypt
2. Organometallic and Organometalloid Chemistry Department, National Research Centre, 12622 Cairo, Egypt
3. Bioassay-Cell Culture Laboratory, National Research Centre, 12622-Dokki, Egypt
4. Cell Biology Department, National Research Centre, 12622-Dokki, Egypt

---

### Correspondence authors

Farid M Sroor, [faridsroor@gmx.de](mailto:faridsroor@gmx.de), [fm.sroor@nrc.sci.eg](mailto:fm.sroor@nrc.sci.eg)

Hamdi M. Hassaneen, [hamdi\\_251@yahoo.com](mailto:hamdi_251@yahoo.com)

MernaTalat-M2-CDC13-H1

Archive directory: /export/home/vnmr1/vnmrSYS/data  
Sample directory: D05mm\_test\_12Mar2014-21:34:40

Pulse Sequence: s2pu1

Solvent: CDC13  
Temp. 30.0 C / 303.1 K  
File: MernaTalat-M2-CDC13-H1  
Mercury-300BB "NMR300"

Relax. delay 6.000 sec  
Pulse 25.4 degrees  
Acq. time 4.004 sec  
Width 6600.7 Hz  
10 repetitions  
OBSERVE H1, 300.0673637 MHz  
DATA PROCESSING  
Line broadening 0.9 Hz  
FT size 65536  
Total time 58 min, 56 sec  
Date: Aug 25 2021

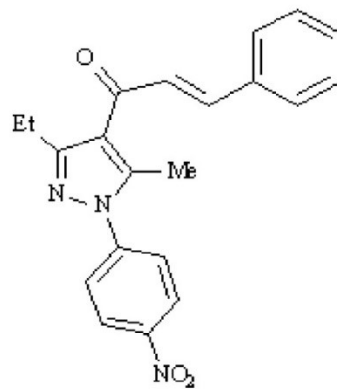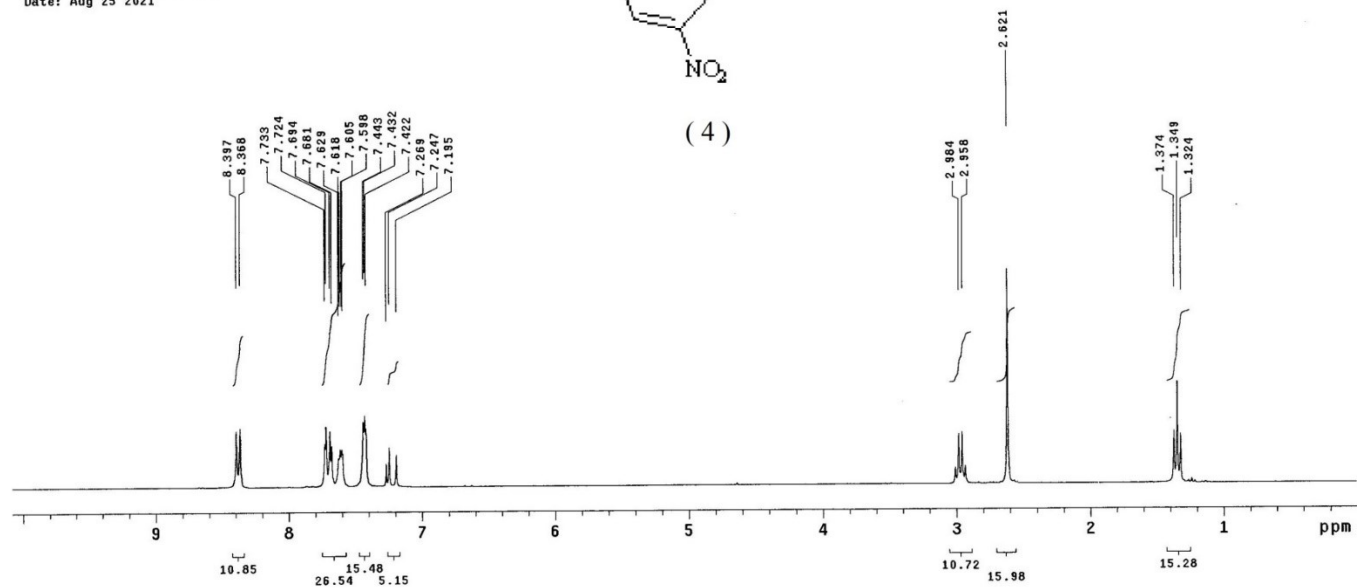



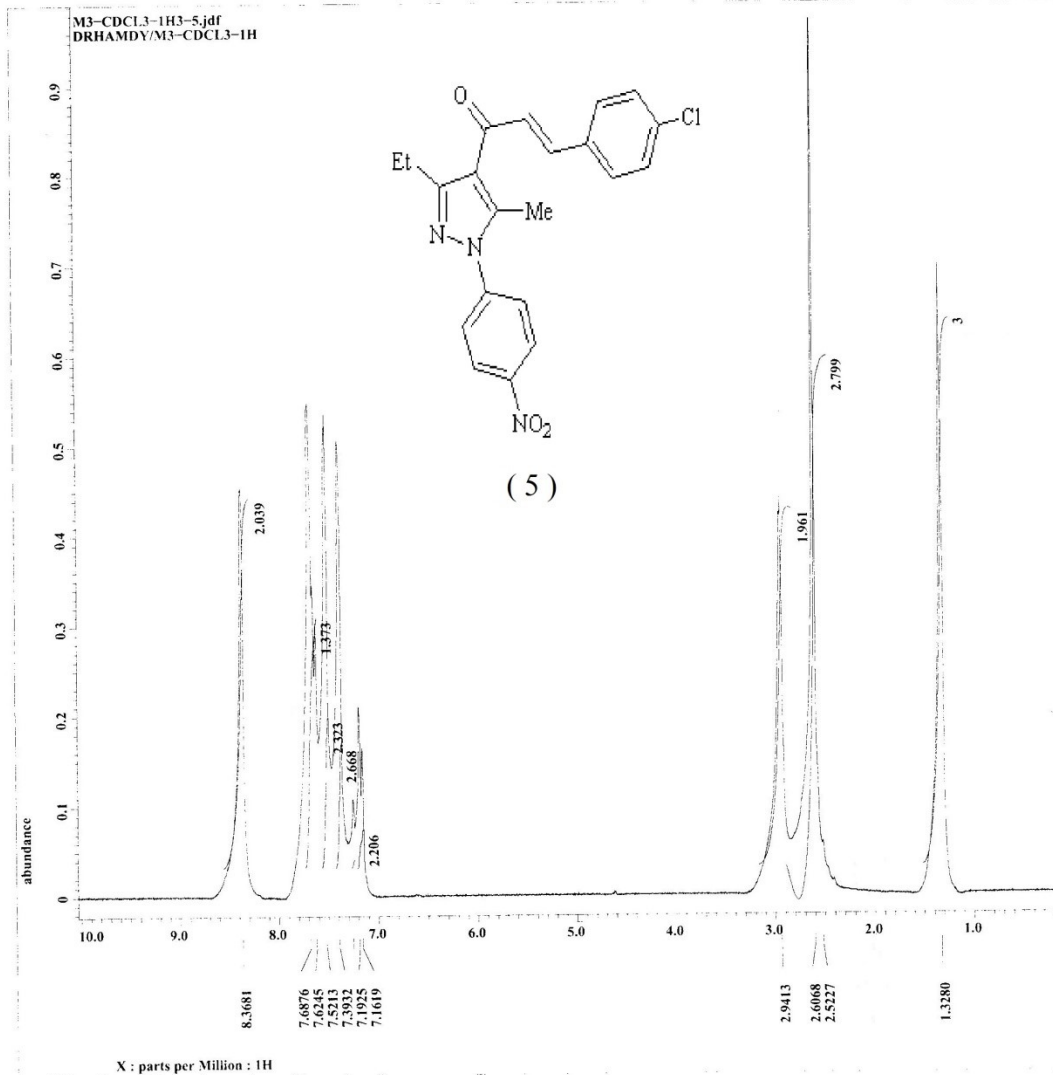

**JEOL**

```

Author          = delta3
Content         = DRHAMDY/M3-CDCL3
Creation_time   = 25-AUG-2021 18:1
Current_time    = 25-AUG-2021 11:2
Data_format     = 1D_REAL
Dim_size        = 13107
Dim_title       = 1H
Dim_units       = [ppm]
Dimensions      = X
Filename        = M3-CDCL3-1H3-5.j
Machine         = scc
Revision_time   = 25-AUG-2021 11:2
Sample_id       = DRHAMDY/M3-CDCL3
Site            = ECA500 (Datum BL)
Spectrometer    = DELTA2_NMR
Scans           = 16
Mod_return      = 1
Total_scans     = 16
X_points        = 16384
X_prescans      = 1
X_domain        = 1H
X_offset        = 5.0 [ppm]
X_freq          = 500.15991521 [MHz]
X_sweep         = 15.6641604 [kHz]
X_resolution    = 0.95606448 [Hz]
Irr_domain      = 1H
Irr_offset      = 5.0 [ppm]
Irr_freq        = 500.15991521 [MHz]
Tri_domain      = 1H
Tri_offset      = 5.0 [ppm]
Tri_freq        = 500.15991521 [MHz]
X_acq_duration  = 1.04595456 [s]
Digital_filter  = TRUE
Filter_factor   = 8
Af_version      = 1
Delay_of_start  = 1.99999974 [s]
Actual_start_time = 25-AUG-2021 18:1
Acq_delay       = 7.94 [us]
Digital_filter_status = 2F
Clipped         = FALSE
Dc_balanced     = FALSE
X90             = 12 [us]
Irr90           = 12 [us]
Tri90           = 10 [us]
Qua90           = 10 [us]
Qui90           = 10 [us]
Sex90           = 10 [us]
Sep90           = 10 [us]
Oct90           = 10 [us]
Non90           = 10 [us]
Dec90           = 10 [us]
X90_hi          = 92 [us]
Irr90_hi        = 92 [us]
Tri90_hi        = 10 [us]
Qua90_hi        = 10 [us]
Qui90_hi        = 10 [us]
Sex90_hi        = 10 [us]
Sep90_hi        = 10 [us]
Oct90_hi        = 10 [us]
Non90_hi        = 10 [us]
Dec90_hi        = 10 [us]
X90_lo          = 92 [us]
Irr90_lo        = 92 [us]
Tri90_lo        = 10 [us]
Qua90_lo        = 10 [us]
Qui90_lo        = 10 [us]
Sex90_lo        = 10 [us]
Sep90_lo        = 10 [us]
Oct90_lo        = 10 [us]
Non90_lo        = 10 [us]

```

HamdyHasaneen-M3-CDC13-C13

Archive directory: /export/home/vnmr1/vnmrsys/data  
Sample directory: DD5mm\_test\_12Mar2014-21:34:40  
File: PROTON

Pulse Sequence: s2pu1  
Solvent: CDC13  
Ambient temperature  
Mercury-300BB "NMR300"

Pulse 45.0 degrees  
Acq. time 1.707 sec  
Width 18761.7 Hz  
1752 repetitions  
OBSERVE C13, 75.4520074 MHz  
DECOUPLE H1, 300.0688576 MHz  
Power 34 dB  
continuously on  
WALTZ-16 modulated  
DATA PROCESSING  
Line broadening 1.0 Hz  
FT size 65536  
Total time 31 hr, 7 min, 12 sec  
Date: Dec 7 2021

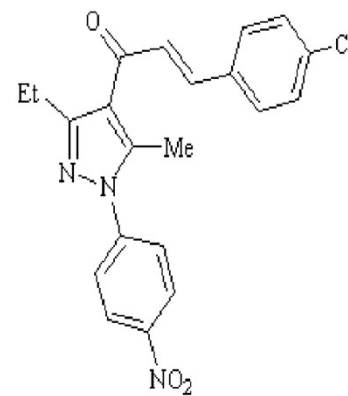

(5)

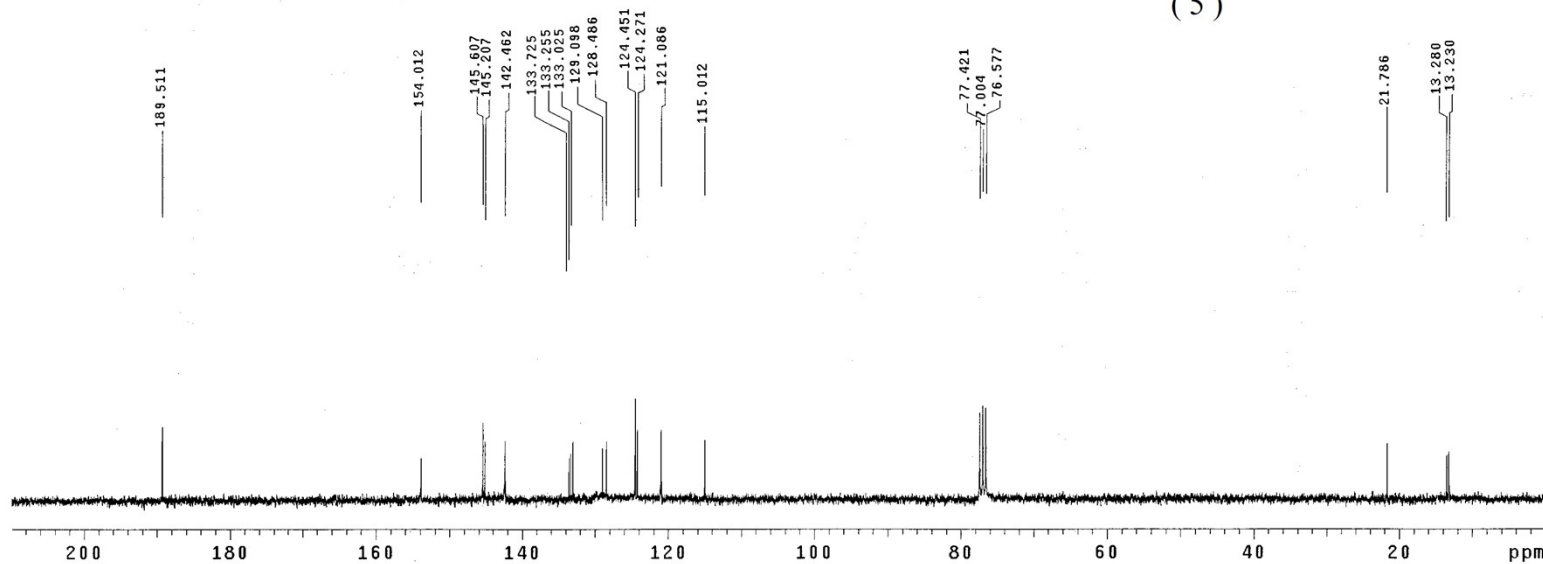

HamdyHasaneen-M13-CDC13-H1

Archive directory: /export/home/vnmr1/vnmrsys/data  
Sample directory: DD5mm\_test\_12Mar2014-21:34:40

Pulse Sequence: s2pu1

Solvent: CDC13  
Temp. 30.0 C / 303.1 K  
File: HamdyHasaneen-M13-CDC13-H1  
Mercury-300BB "NMR300"

Relax. delay 6.000 sec  
Pulse 25.4 degrees  
Acq. time 4.004 sec  
Width 6600.7 Hz  
7 repetitions  
OBSERVE H1, 300.0673637 MHz  
DATA PROCESSING  
Line broadening 0.9 Hz  
FT size 65536  
Total time 58 min, 56 sec  
Date: Nov 29 2023

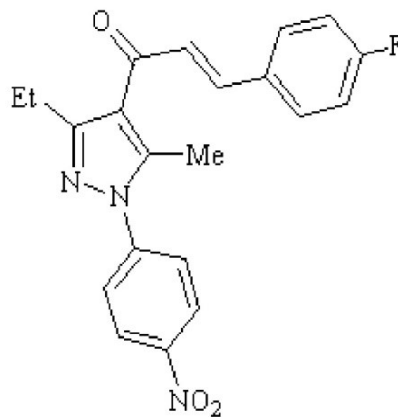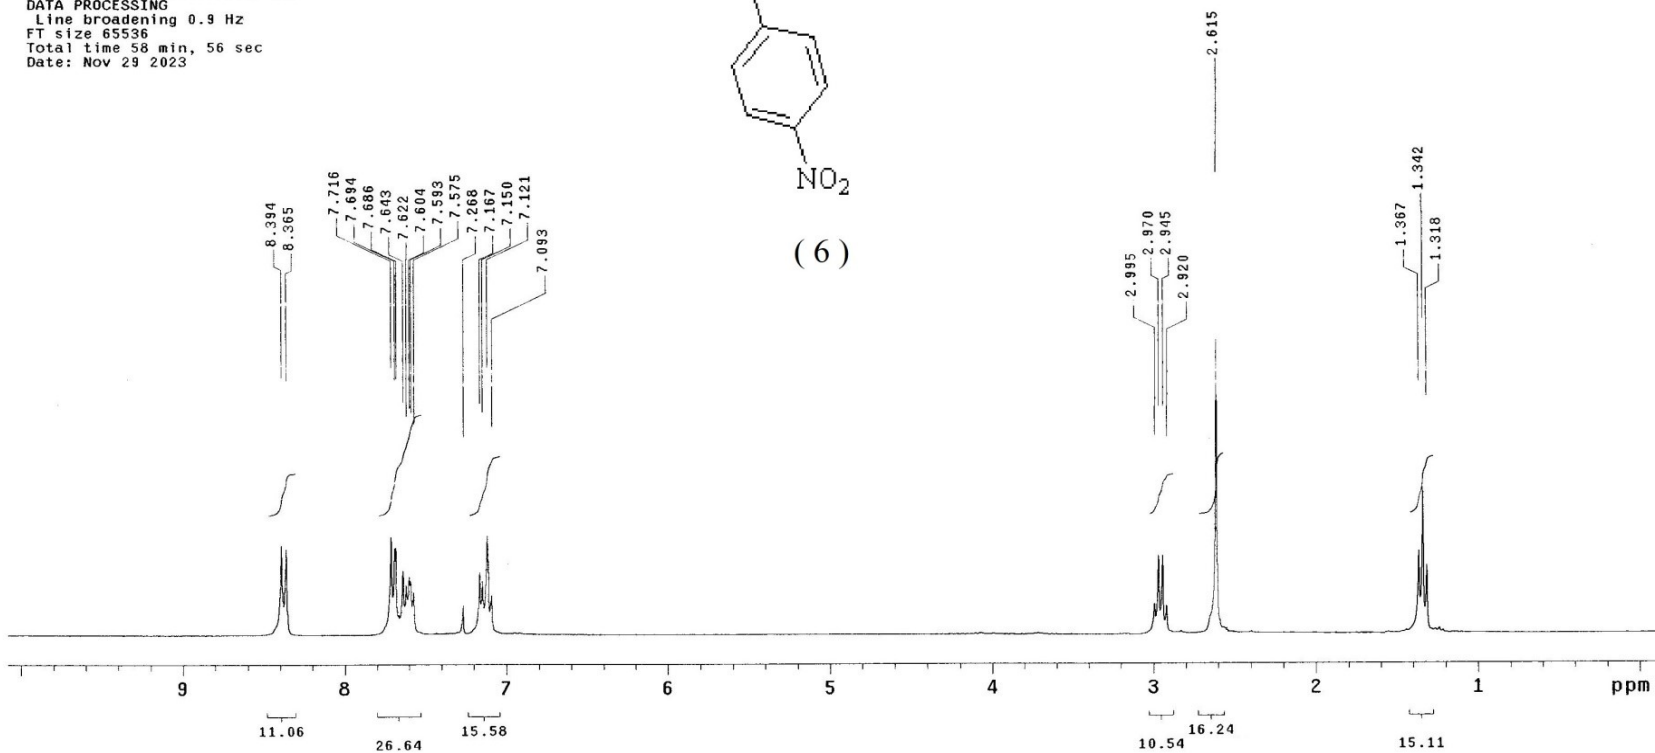

HamdyHasaneen-M13-CDC13-C13

Archive directory: /export/home/vnmr1/vnmrsys/data  
Sample directory: DD5mm\_test\_12Mar2014-21:34:40  
File: PROTON

Pulse Sequence: s2pu1  
Solvent: CDC13  
Ambient temperature  
Mercury-300BB "NMR300"

Pulse 45.0 degrees  
Acq. time 1.707 sec  
Width 18761.7 Hz  
2088 repetitions  
OBSERVE C13, 75.4520097 MHz  
DECOUPLE H1, 300.0688576 MHz  
Power 34 dB  
continuously on  
WALTZ-16 modulated  
DATA PROCESSING  
Line broadening 1.0 Hz  
FT size 65536  
Total time 24 hr, 53 min, 46 sec  
Date: Nov 30 2023

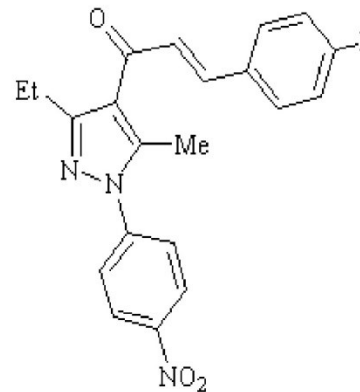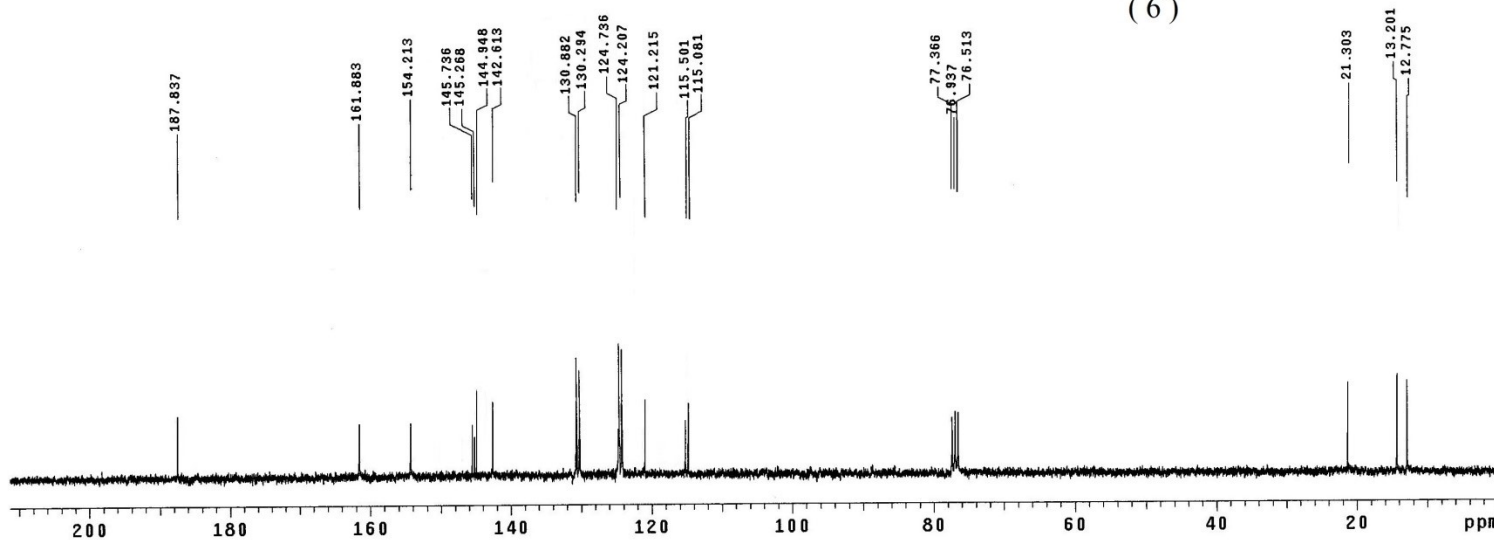

MohammadAbdulMoaty-M4-CDC13-C13

Archive directory: /export/home/vnmr1/vnmrsys/data  
Sample directory: DD5mm\_test\_12Mar2014-21:34:40  
File: PROTON

Pulse Sequence: s2pu1  
Solvent: CDC13  
Ambient temperature  
Mercury-300BB "NMR300"

Pulse 45.0 degrees  
Acq. time 1.707 sec  
Width 18761.7 Hz  
1456 repetitions  
OBSERVE C13, 75.4520091 MHz  
DECOUPLE H1, 300.0688576 MHz  
Power 34 dB  
continuously on  
WALTZ-16 modulated  
DATA PROCESSING  
Line broadening 1.0 Hz  
FT size 65536  
Total time 24 hr, 53 min, 46 sec  
Date: Jan 13 2021

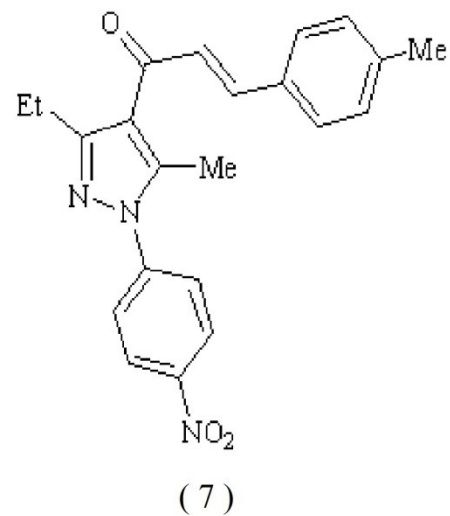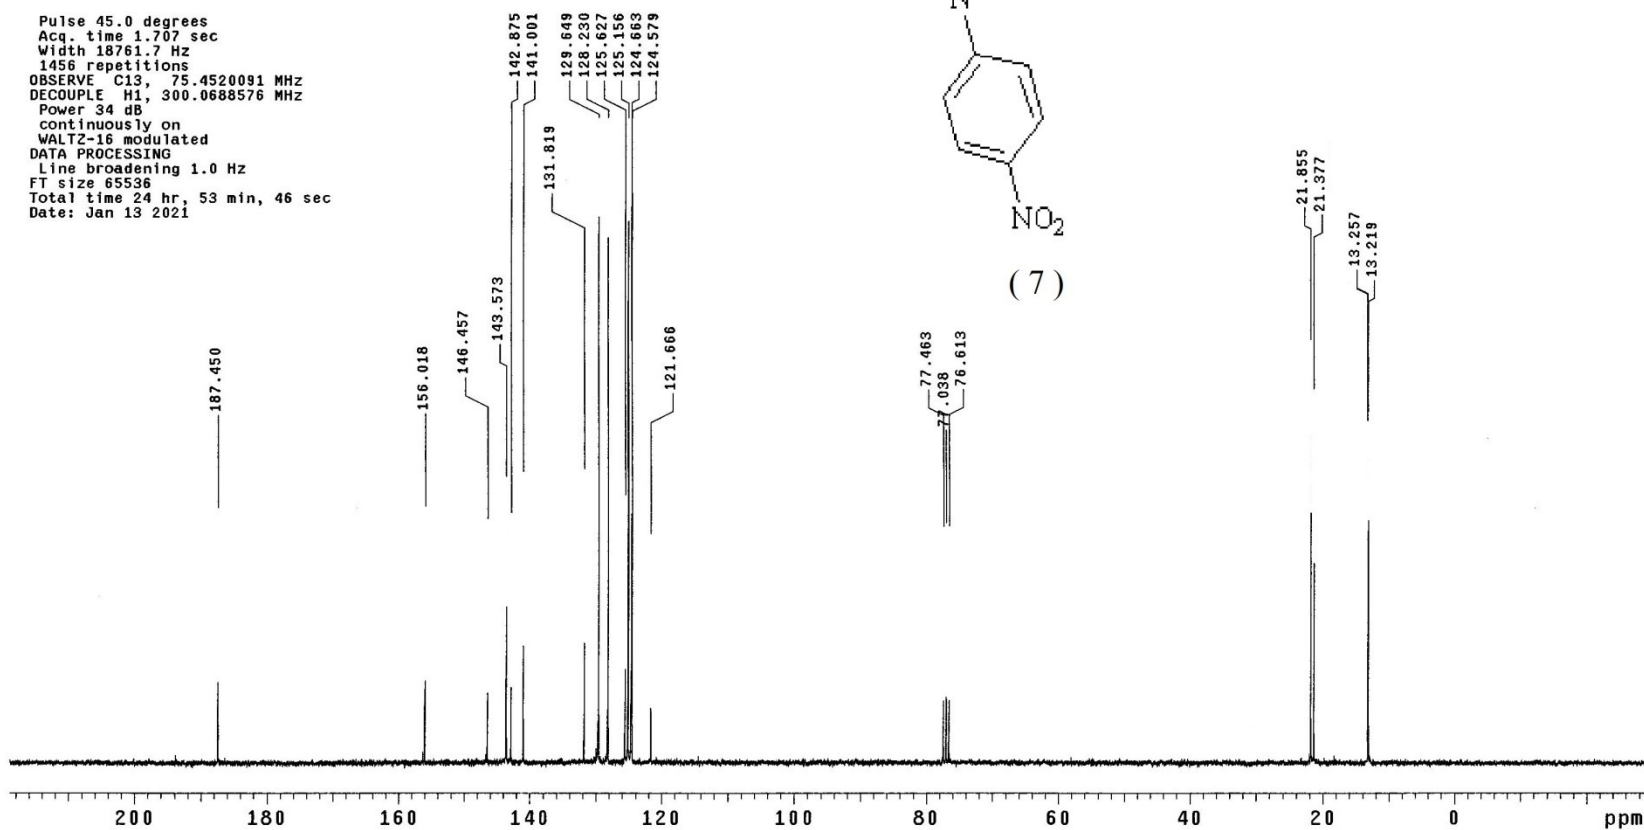



MernaTatlat-M5-CDC13-H1

Archive directory: /export/home/vnmr1/vnmrsys/data  
Sample directory: DD5mm\_test\_12Mar2014-21:34:40  
File: PROTON

Pulse Sequence: s2pu1  
Solvent: CDC13  
Temp. 30.0 C / 303.1 K  
Mercury-300BB "NMR300"

Relax. delay 6.000 sec  
Pulse 25.4 degrees  
Acq. time 4.004 sec  
Width 6600.7 Hz  
14 repetitions  
OBSERVE H1, 300.0673637 MHz  
DATA PROCESSING  
Line broadening 0.9 Hz  
FT size 65536  
Total time 58 min, 56 sec  
Date: Aug 25 2021

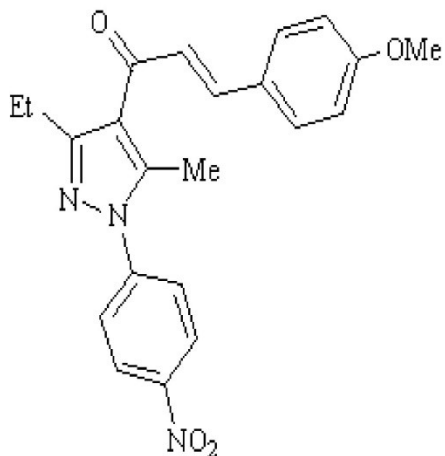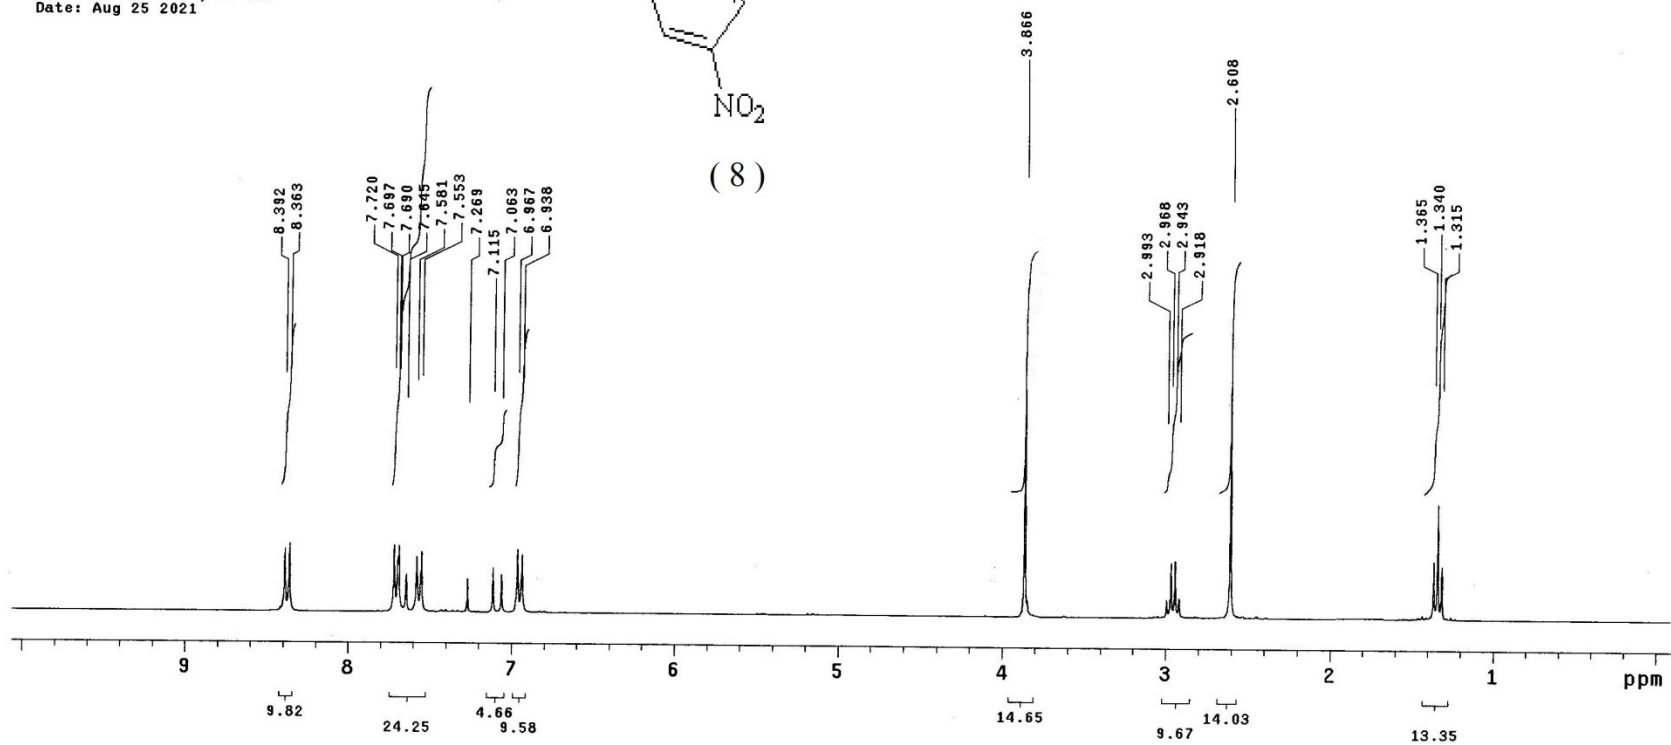

MernaTalaat-M5-CDC13-C13

Archive directory: /export/home/vnmr1/vnmrsys/data  
Sample directory: DD5mm\_test\_12Mar2014-21:34:40  
File: PROTON

Pulse Sequence: s2pu1

Solvent: CDC13  
Ambient temperature  
Mercury-300BB "NMR300"

Pulse 45.0 degrees  
Acq. time 1.707 sec  
Width 18761.7 Hz  
2096 repetitions  
OBSERVE C13, 75.4520034 MHz  
DECOUPLE H1, 300.0688576 MHz  
Power 34 dB  
continuously on  
WALTZ-16 modulated  
DATA PROCESSING  
Line broadening 1.0 Hz  
FT size 65536  
Total time 31 hr, 7 min, 12 sec  
Date: Aug 31 2021

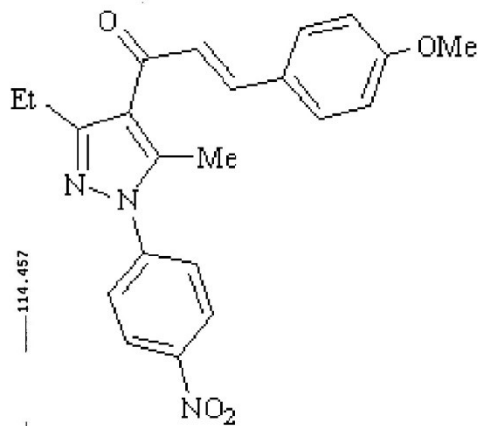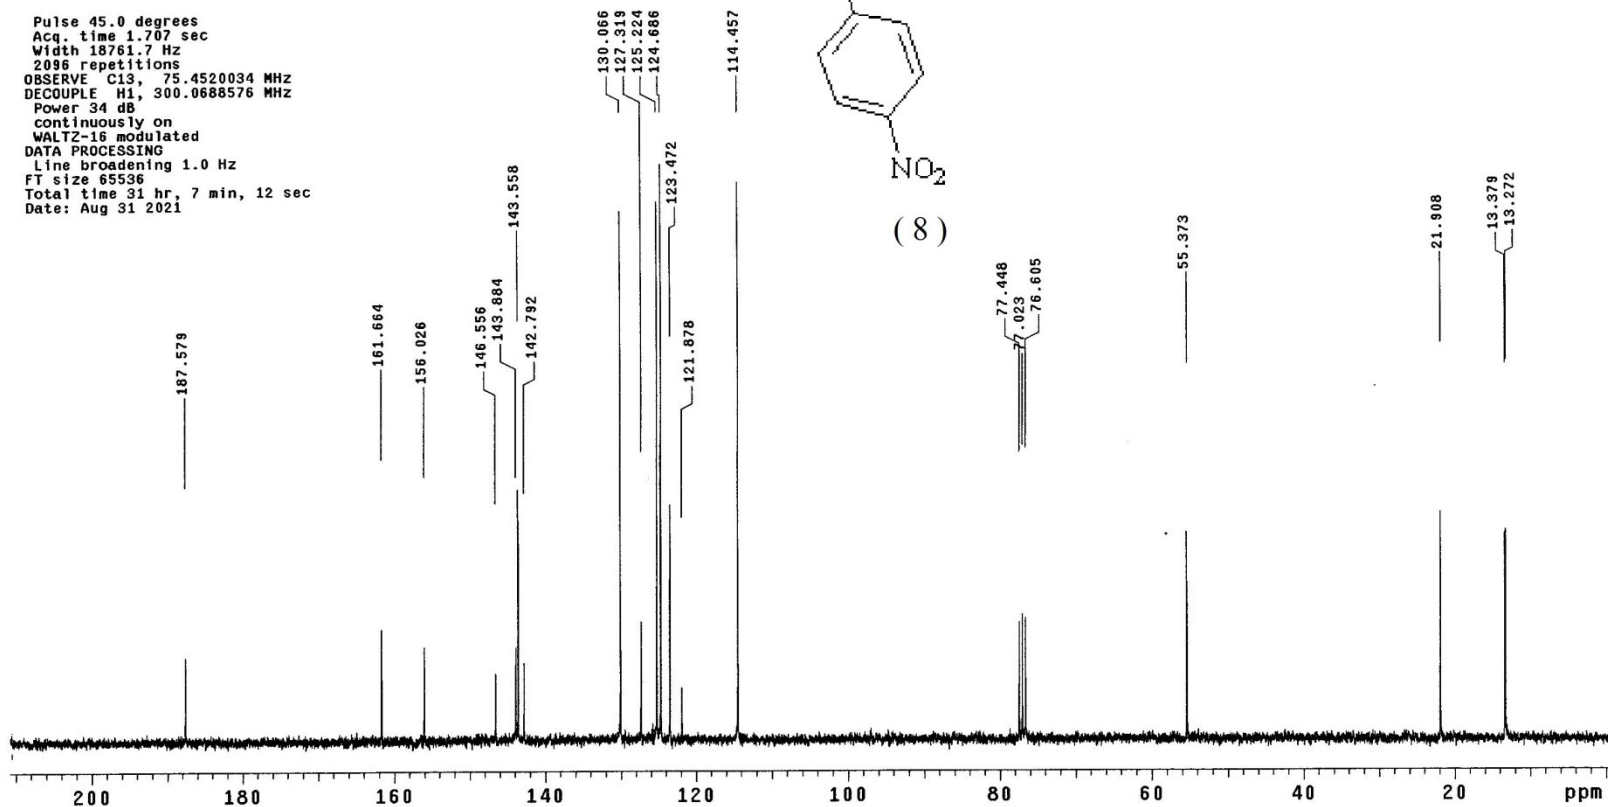

MernaTalat-M6-CDC13-H1

Archive directory: /export/home/vnmr1/vnmrsys/data  
Sample directory: DD5mm\_test\_12Mar2014-21:34:40

Pulse Sequence: s2pu1

Solvent: CDC13  
Temp. 30.0 C / 303.1 K  
File: MernaTalat-A26-CDC13-H1  
Mercury-300BB "NMR300"

Relax. delay 6.000 sec  
Pulse 25.4 degrees  
Acq. time 4.004 sec  
Width 6600.7 Hz  
20 repetitions  
OBSERVE H1, 300.0673637 MHz  
DATA PROCESSING  
Line broadening 0.9 Hz  
FT size 65536  
Total time 58 min, 56 sec  
Date: Aug 25 2021

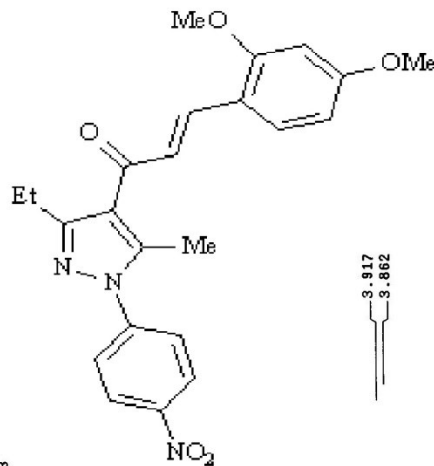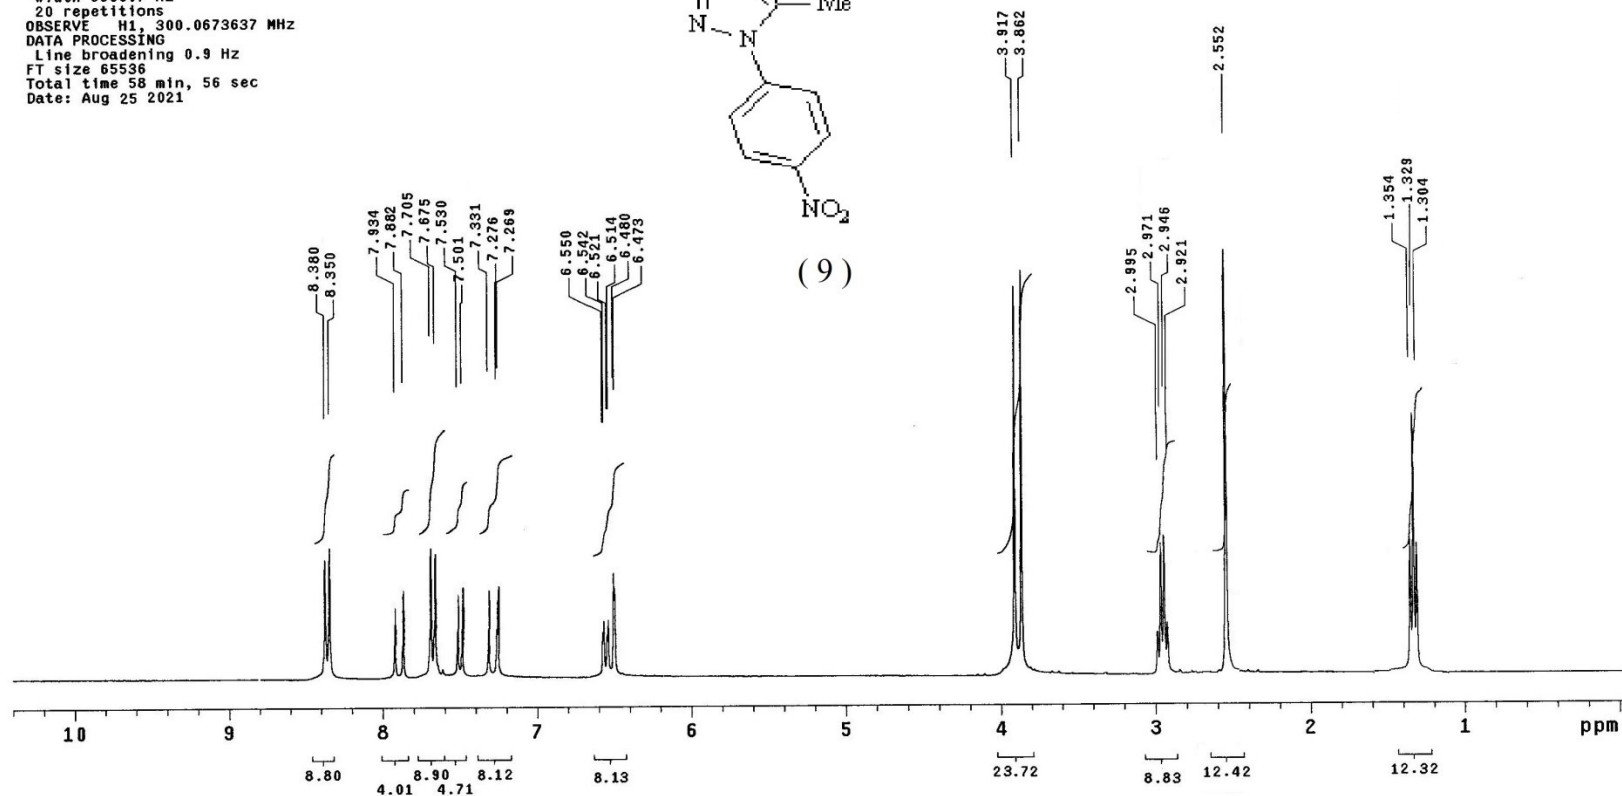

MernaTalaat-M6-CDC13-C13

Archive directory: /export/home/vnmr1/vnmrsys/data  
Sample directory: DD5mm\_test\_12Mar2014-21:34:40  
File: PROTON

Pulse Sequence: s2pu1  
Solvent: CDC13  
Ambient temperature  
Mercury-300BB "NMR300"

Pulse 45.0 degrees  
Acq. time 1.707 sec  
Width 18761.7 Hz  
1360 repetitions  
OBSERVE C13, 75.4520097 MHz  
DECOUPLE H1, 300.0688576 MHz  
Power 34 dB  
continuously on  
WALTZ-16 modulated  
DATA PROCESSING  
Line broadening 1.0 Hz  
FT size 65536  
Total time 24 hr, 53 min, 46 sec  
Date: Aug 26 2021

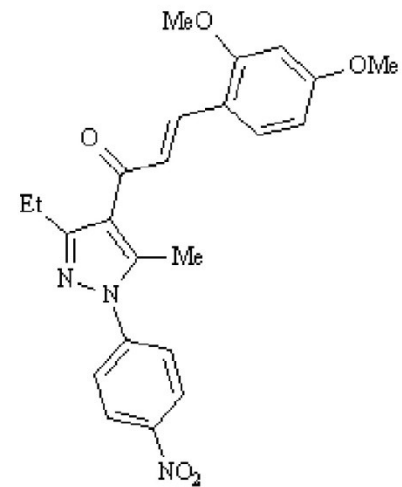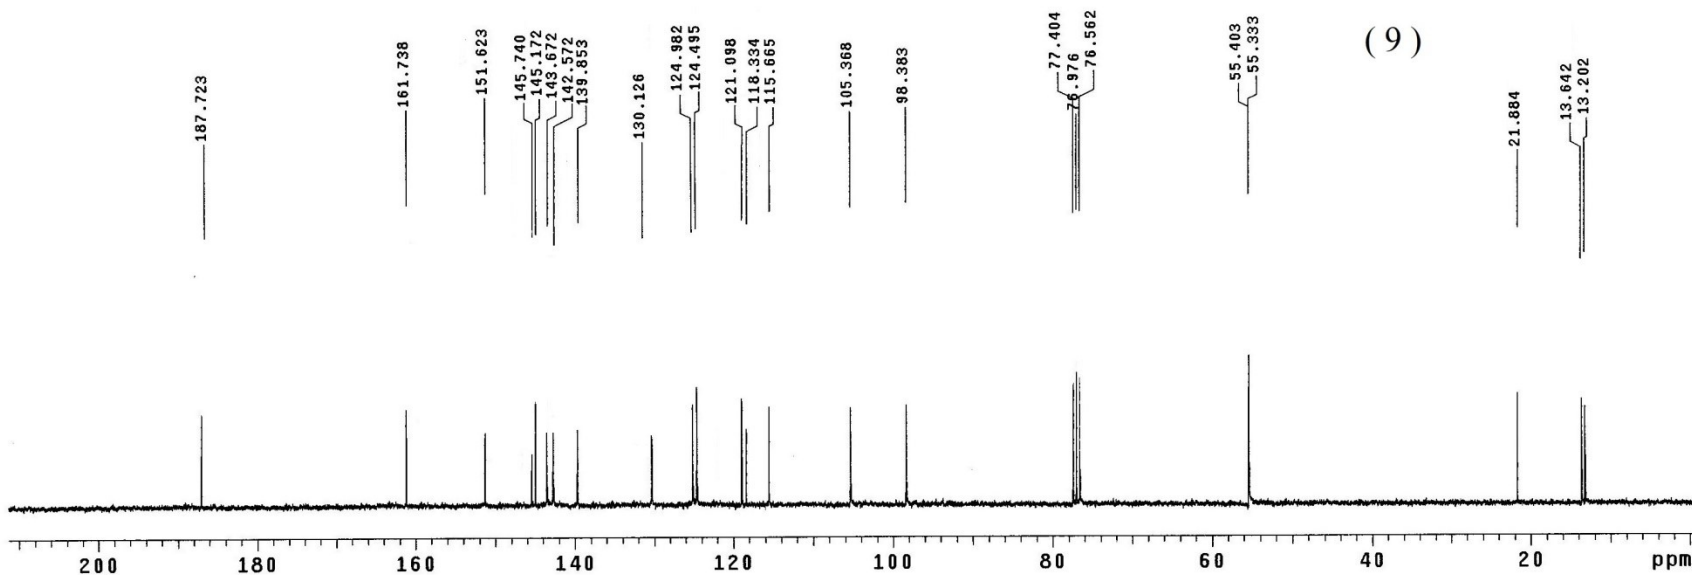

MernaTalat-M7-CDC13-H1

Archive directory: /export/home/vnmr1/vnmrsys/data  
Sample directory: DD5mm\_test\_12Mar2014-21:34:40  
File: PROTON

Pulse Sequence: s2pu1

Solvent: CDC13  
Temp. 30.0 C / 303.1 K  
Mercury-300BB "NMR300"

Relax. delay 6.000 sec  
Pulse 25.4 degrees  
Acq. time 4.004 sec  
Width 6600.7 Hz  
9 repetitions  
OBSERVE H1, 300.0673637 MHz  
DATA PROCESSING  
Line broadening 0.9 Hz  
FT size 65536  
Total time 58 min, 56 sec  
Date: Aug 25 2021

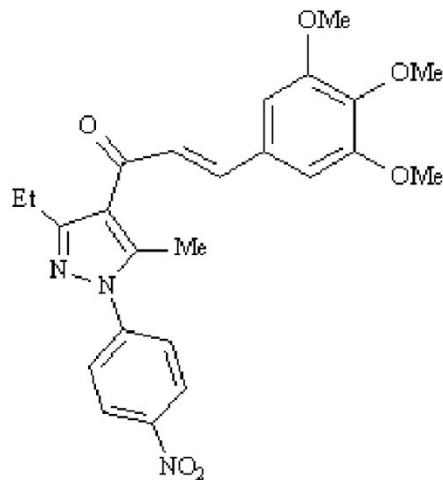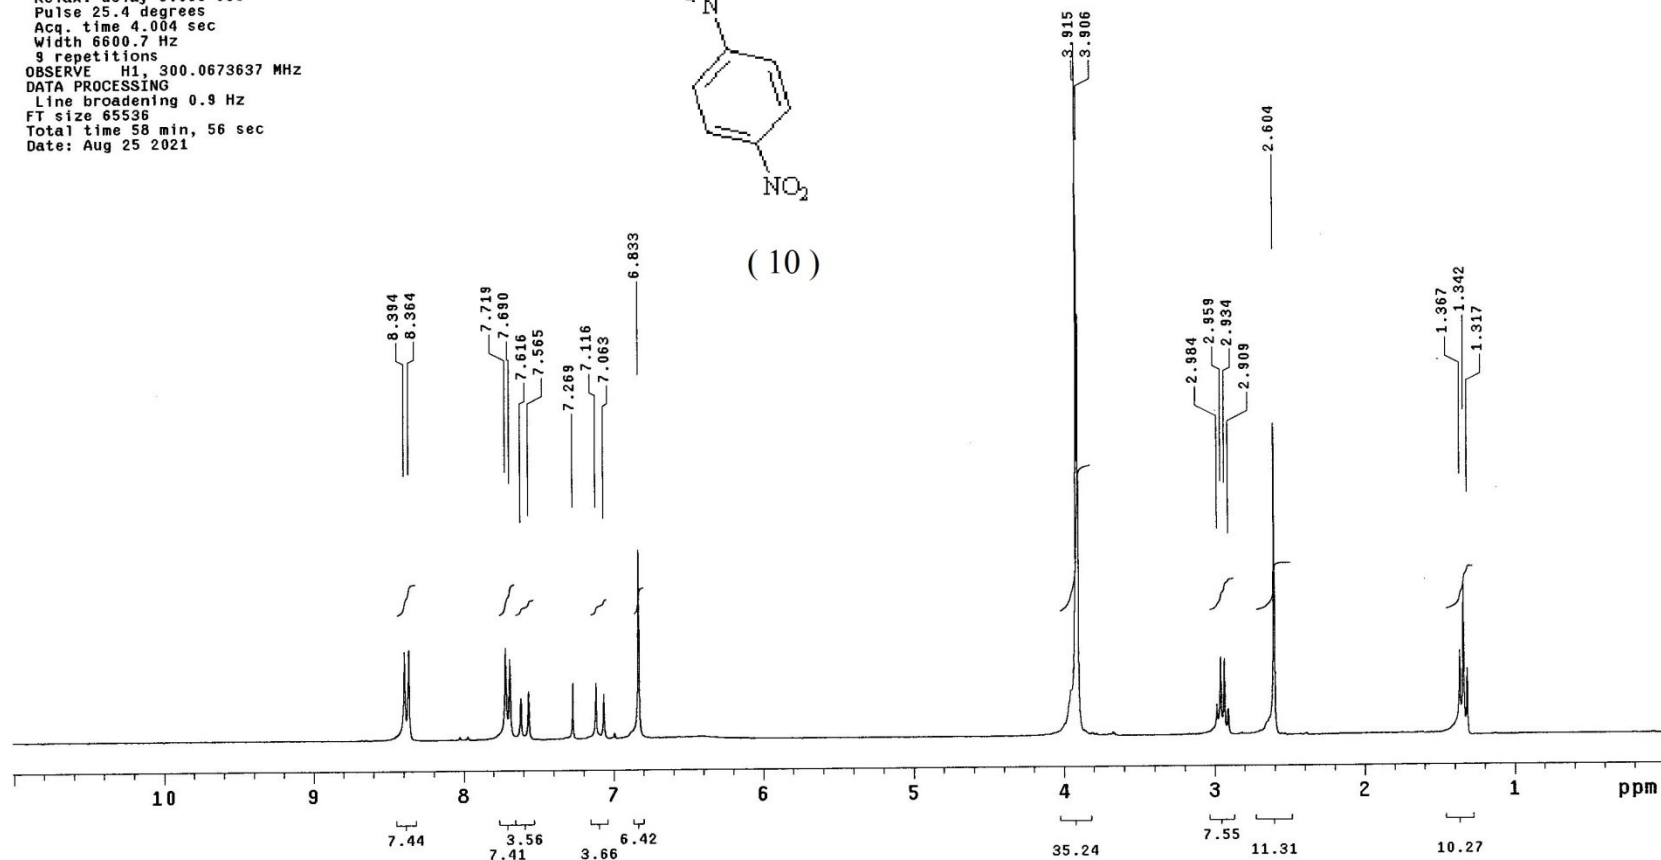

MernaTatlat-M7-CDC13-C13

Archive directory: /export/home/vnmr1/vnmrsys/data  
Sample directory: DD5mm\_test\_12Mar2014-21:34:40  
File: PROTON

Pulse Sequence: s2pu1  
Solvent: CDC13  
Ambient temperature  
Mercury-300BB "NMR300"

Pulse 45.0 degrees  
Acq. time 1.707 sec  
Width 18761.7 Hz  
1312 repetitions  
OBSERVE C13, 75.4520034 MHz  
DECOUPLE H1, 300.0688576 MHz  
Power 34 dB  
continuously on  
WALTZ-16 modulated  
DATA PROCESSING  
Line broadening 1.0 Hz  
FT size 65536  
Total time 31 hr, 7 min, 12 sec  
Date: Aug 30 2021

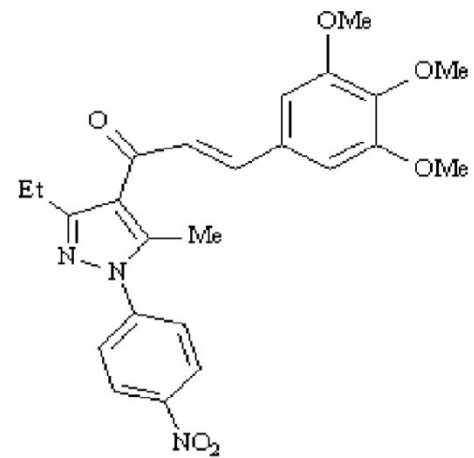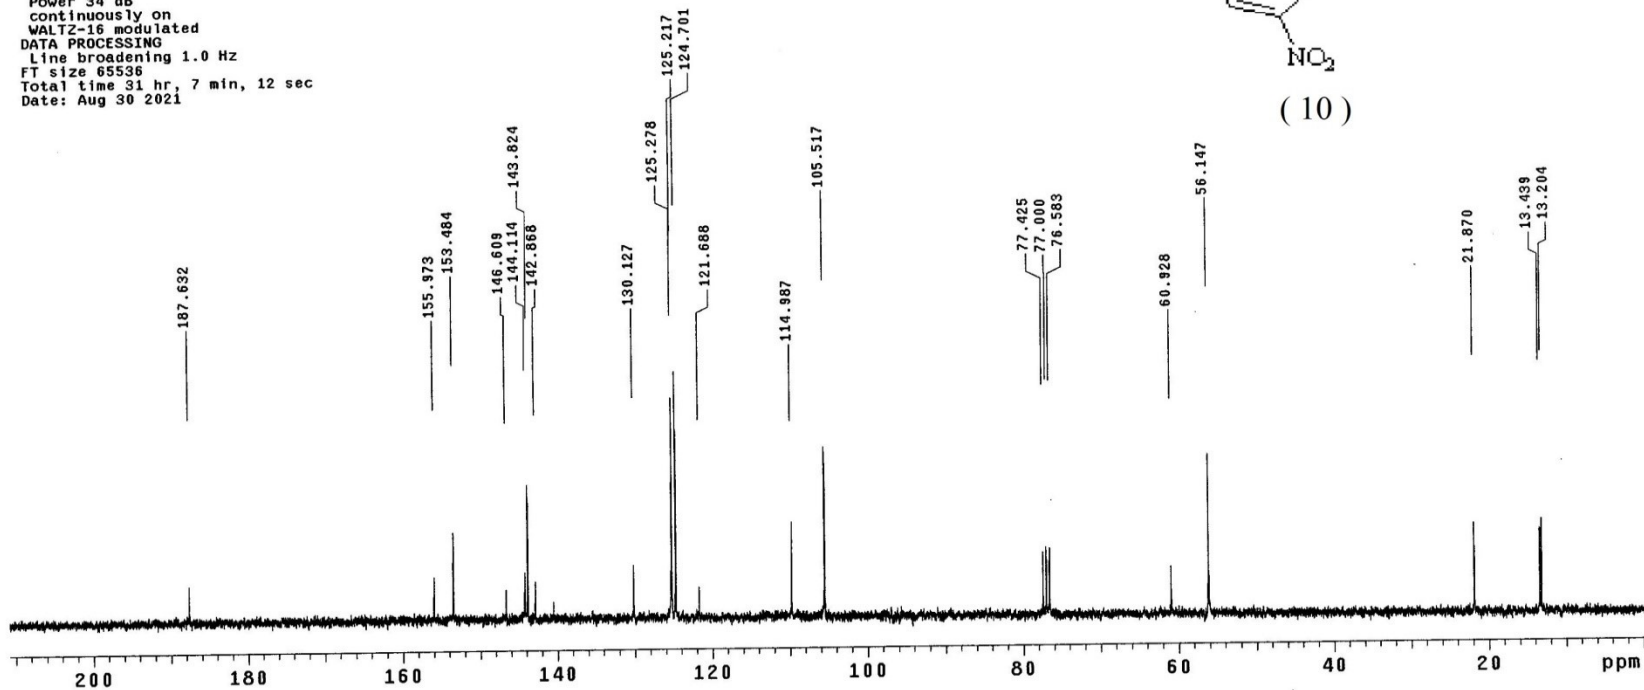



MernaTalaat-M9-CDC13-C13

Archive directory: /export/home/vnmr1/vnmrSYS/data  
Sample directory: DD5mm\_test\_12Mar2014-21:34:40  
File: PROTON

Pulse Sequence: s2pu1

Solvent: DMSO  
Ambient temperature  
Mercury-300BB "NMR300"

Pulse 45.0 degrees  
Acq. time 1.707 sec  
Width 18761.7 Hz  
1160 repetitions  
OBSERVE C13, 75.4523880 MHz  
DECOUPLE H1, 300.0702830 MHz  
Power 34 dB  
continuously on  
WALTZ-16 modulated  
DATA PROCESSING  
Line broadening 1.0 Hz  
FT size 65536  
Total time 31 hr, 7 min, 12 sec  
Date: Oct 13 2021

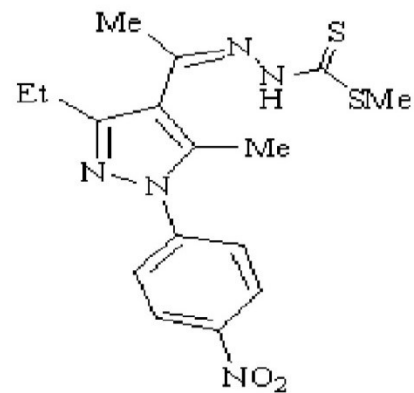

(13)

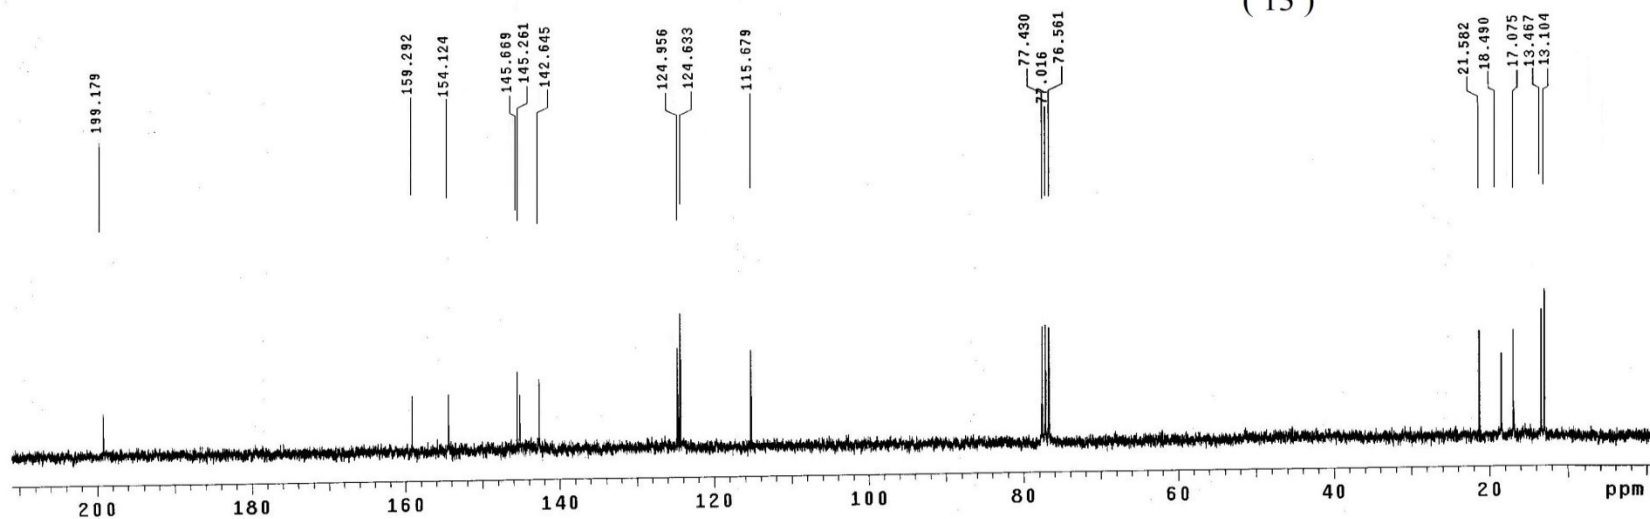



MernaTalat-M8-DMSO-H1

Archive directory: /export/home/vnmr1/vnmrsys/data  
Sample directory: DD5mm\_test\_12Mar2014-21:34:40

Pulse Sequence: s2pul

Solvent: DMSO  
Temp. 30.0 C / 303.1 K  
File: MernaTalat-M8-DMSO-H1  
Mercury-300BB "NMR300"

Relax. delay 6.000 sec  
Pulse 45.0 degrees  
Acq. time 4.000 sec  
Width 6600.7 Hz  
7 repetitions  
OBSERVE H1, 300.0687870 MHz  
DATA PROCESSING  
Line broadening 0.1 Hz  
FT size 6536  
Total time 58 min, 55 sec  
Date: Aug 4 2021

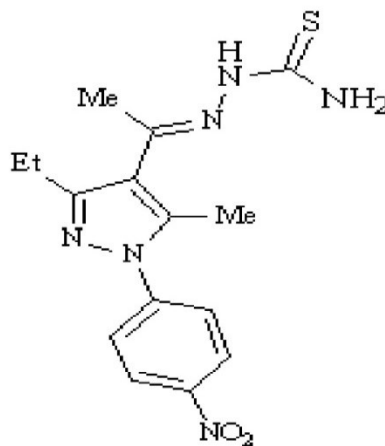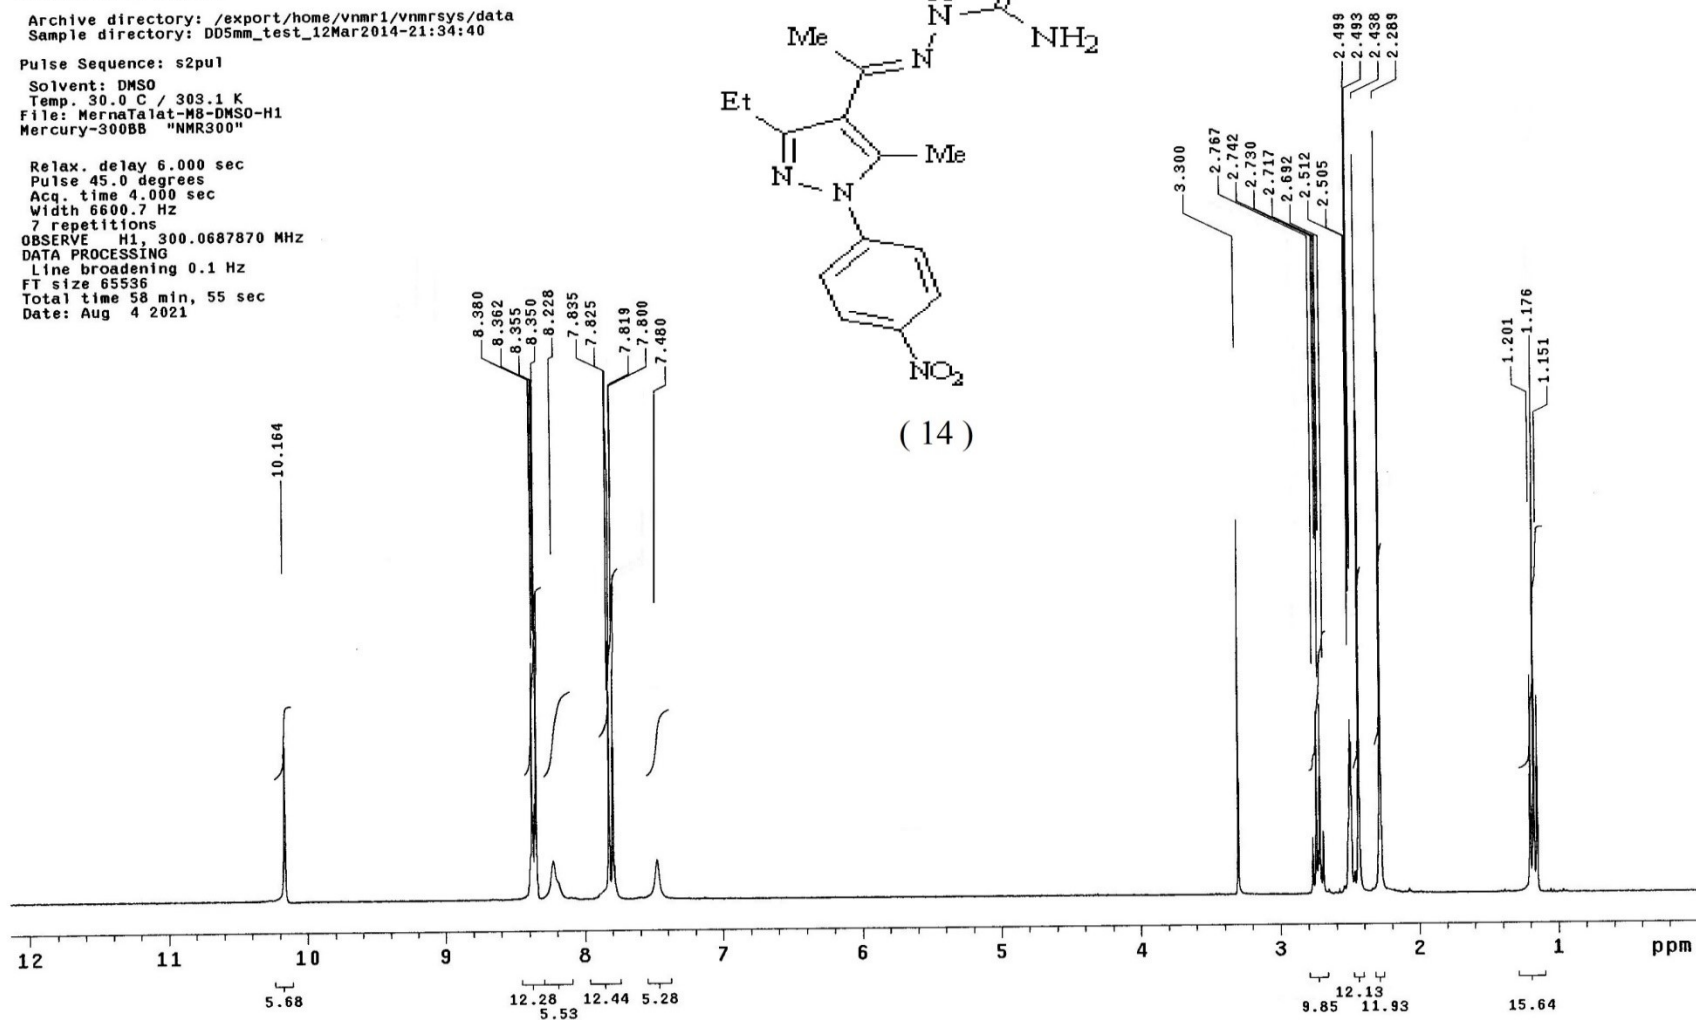

MernaTalaat-M8-DMSO-C13

Archive directory: /export/home/vnmr1/vnmrSYS/data  
Sample directory: DD5mm\_test\_12Mar2014-21:34:40  
File: PROTON

Pulse Sequence: s2pu1  
Solvent: DMSO  
Ambient temperature  
Mercury-300BB "NMR300"

Pulse 45.0 degrees  
Acq. time 1.707 sec  
Width 18761.7 Hz  
3456 repetitions  
OBSERVE C13, 75.4523885 MHz  
DECOUPLE H1, 300.0702830 MHz  
Power 34 dB  
continuously on  
WALTZ-16 modulated  
DATA PROCESSING  
Line broadening 1.0 Hz  
FT size 65536  
Total time 31 hr, 7 min, 12 sec  
Date: Aug 5 2021

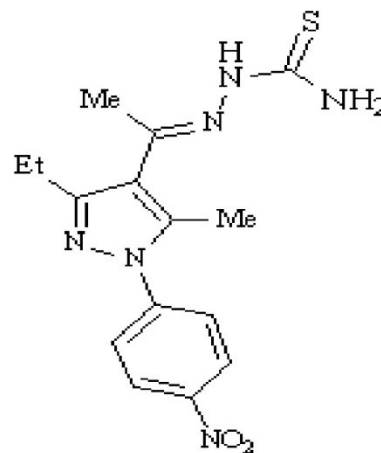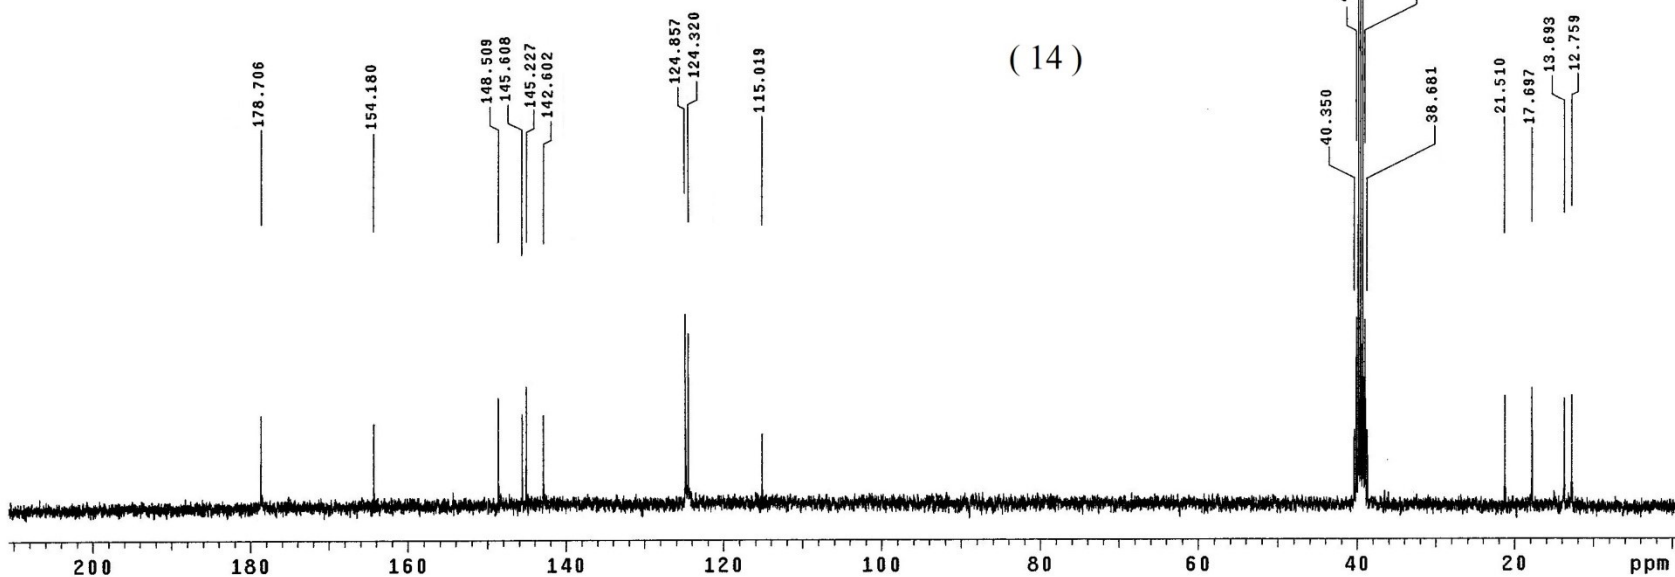



MohammadAbdulMoaty-M11-CDC13-C13

Archive directory: /export/home/vnmr1/vnmrsys/data  
Sample directory: DD5mm\_test\_12Mar2014-21:34:40  
File: PROTON

Pulse Sequence: s2pu1  
Solvent: CDC13  
Ambient temperature  
Mercury-300BB "NMR300"

Pulse 45.0 degrees  
Acq. time 1.707 sec  
Width 18761.7 Hz  
1664 repetitions  
OBSERVE C13, 75.4520091 MHz  
DECOUPLE H1, 300.0688576 MHz  
Power 34 dB  
continuously on  
WALTZ-16 modulated  
DATA PROCESSING  
Line broadening 1.0 Hz  
FT size 65536  
Total time 24 hr, 53 min, 46 sec  
Date: Jan 13 2021

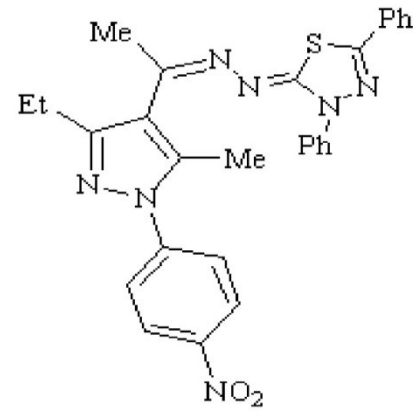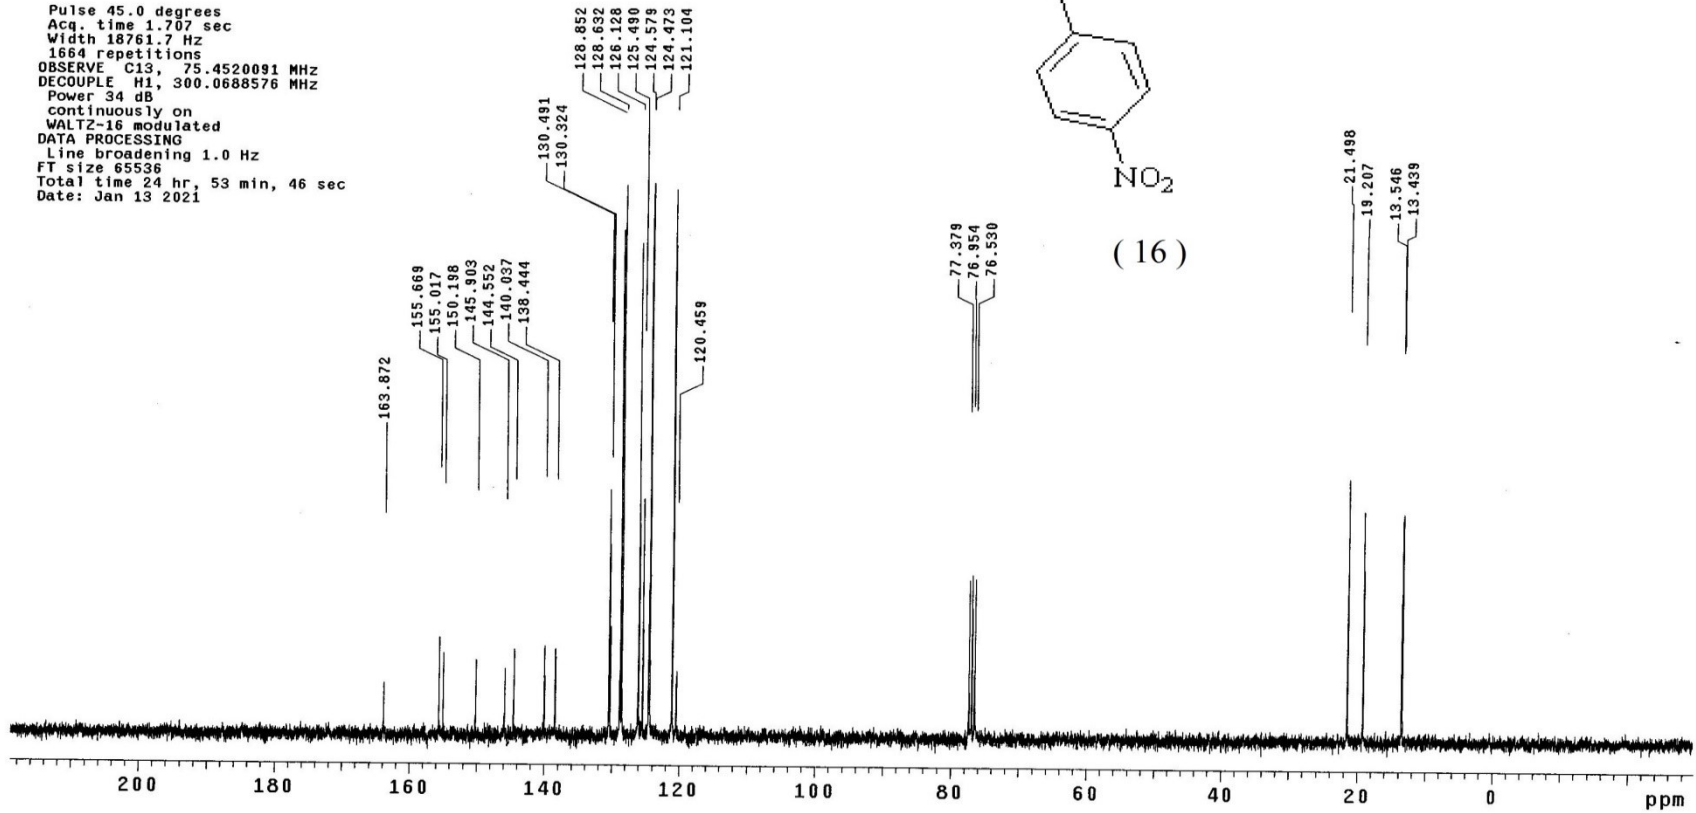

MernaTalat-M24-CDC13-H1

Archive directory: /export/home/vnmr1/vnmrSYS/data  
Sample directory: D05mm\_test\_12Mar2014-21:34:40  
File: PROTON

Pulse Sequence: s2pu1

Solvent: CDC13  
Temp. 30.0 C / 303.1 K  
Mercury-300BB "NMR300"

Relax. delay 6.000 sec  
Pulse 45.0 degrees  
Acq. time 4.004 sec  
Width 6600.7 Hz  
8 repetitions  
OBSERVE H1, 300.0673635 MHz  
DATA PROCESSING  
Line broadening 0.9 Hz  
FT size 65536  
Total time 58 min, 56 sec  
Date: Mar 30 2021

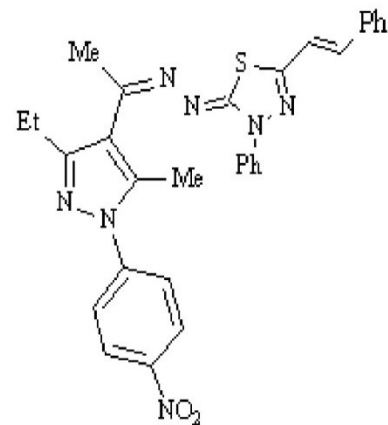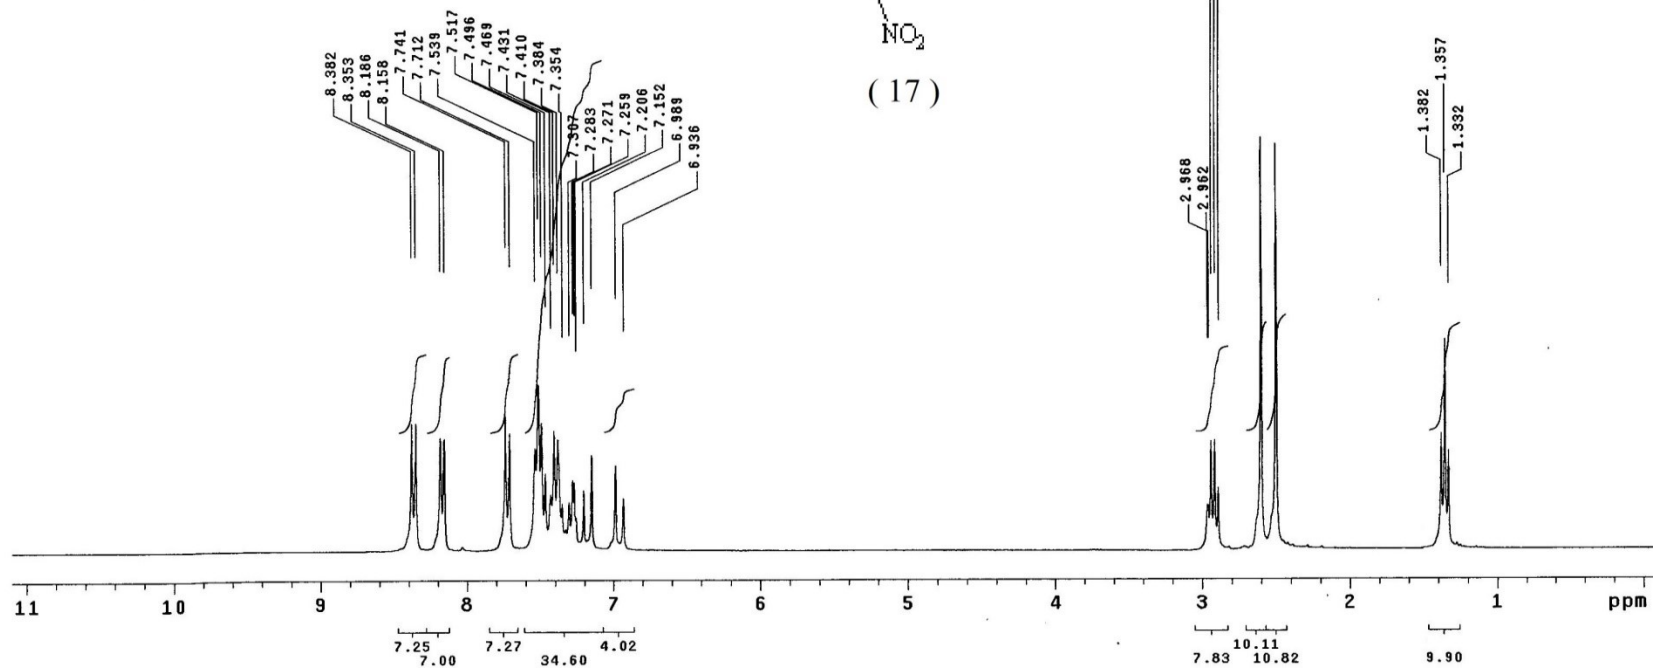

HamdyHasaneen-M24-CDC13-C13

Archive directory: /export/home/vnmr1/vnmrsys/data  
Sample directory: DD5mm\_test\_12Mar2014-21:34:40  
File: PROTON

Pulse Sequence: s2pu1  
Solvent: CDC13  
Ambient temperature  
Mercury-300BB "NMR300"

Pulse 45.0 degrees  
Acq. time 1.707 sec  
Width 18761.7 Hz  
2688 repetitions  
OBSERVE C13, 75.4520062 MHz  
DECOUPLE H1, 300.0688576 MHz  
Power 34 dB  
continuously on  
WALTZ-16 modulated  
DATA PROCESSING  
Line broadening 1.0 Hz  
FT size 65536  
Total time 24 hr, 53 min, 46 sec  
Date: Apr 5 2021

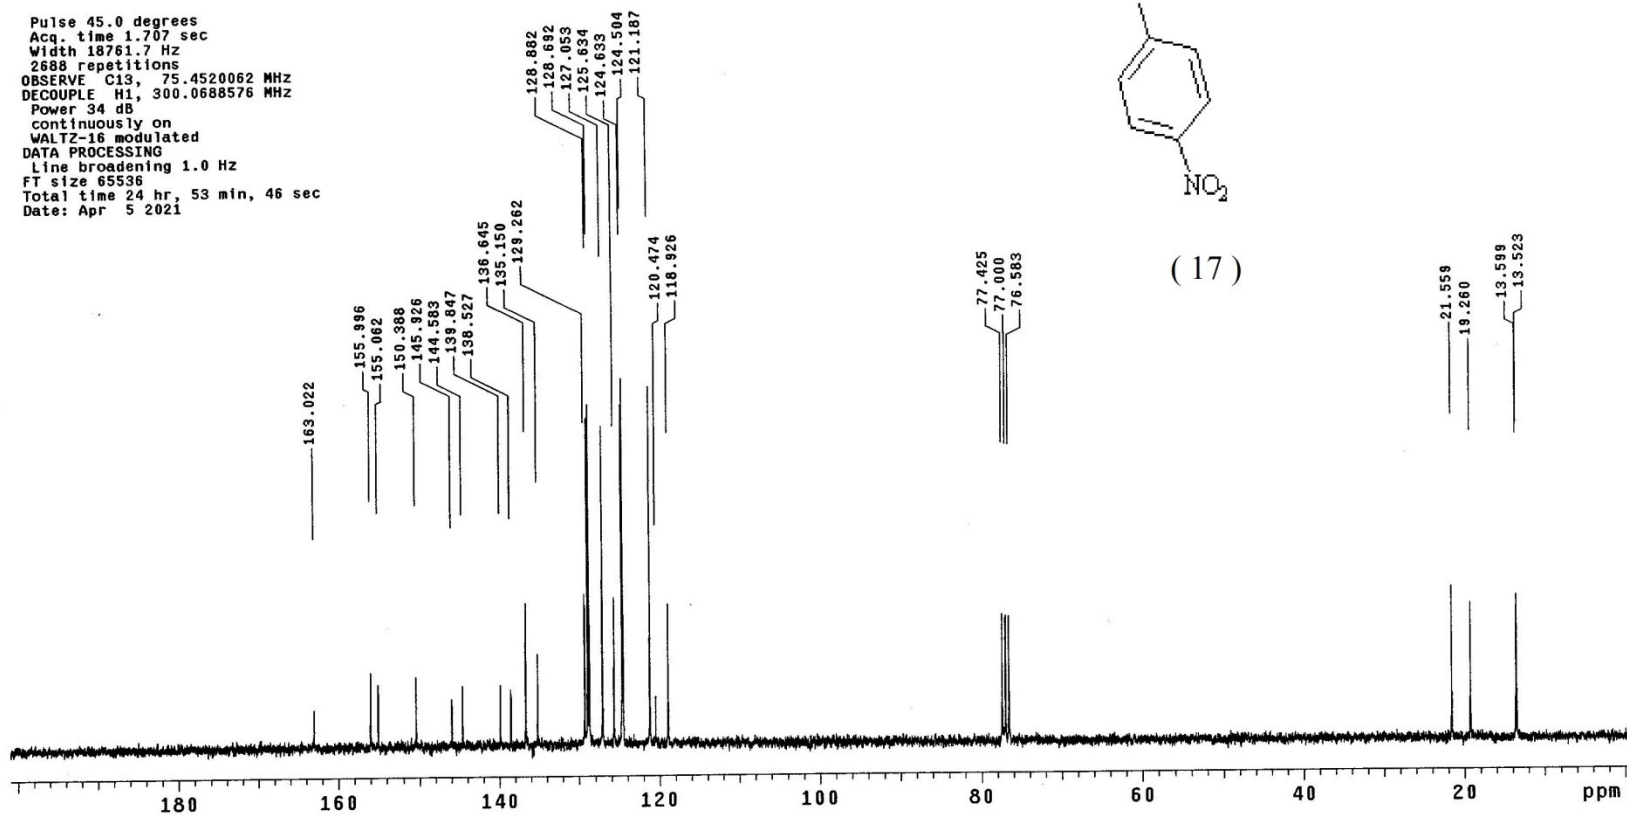

MernaTalat-M23-CDC13-H1

Archive directory: /export/home/vnmr1/vnmrsys/data  
Sample directory: D05mm\_test\_12Mar2014-21:34:40  
File: PROTON

Pulse Sequence: s2pu1  
Solvent: CDC13  
Temp. 30.0 C / 303.1 K  
Mercury-300BB "NMR300"

Relax. delay 6.000 sec  
Pulse 45.0 degrees  
Acq. time 4.004 sec  
Width 6600.7 Hz  
9 repetitions  
OBSERVE H1, 300.0673635 MHz  
DATA PROCESSING  
Line broadening 0.3 Hz  
FT size 65536  
Total time 58 min, 56 sec  
Date: Mar 30 2021

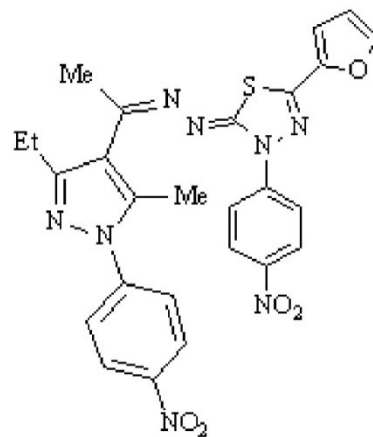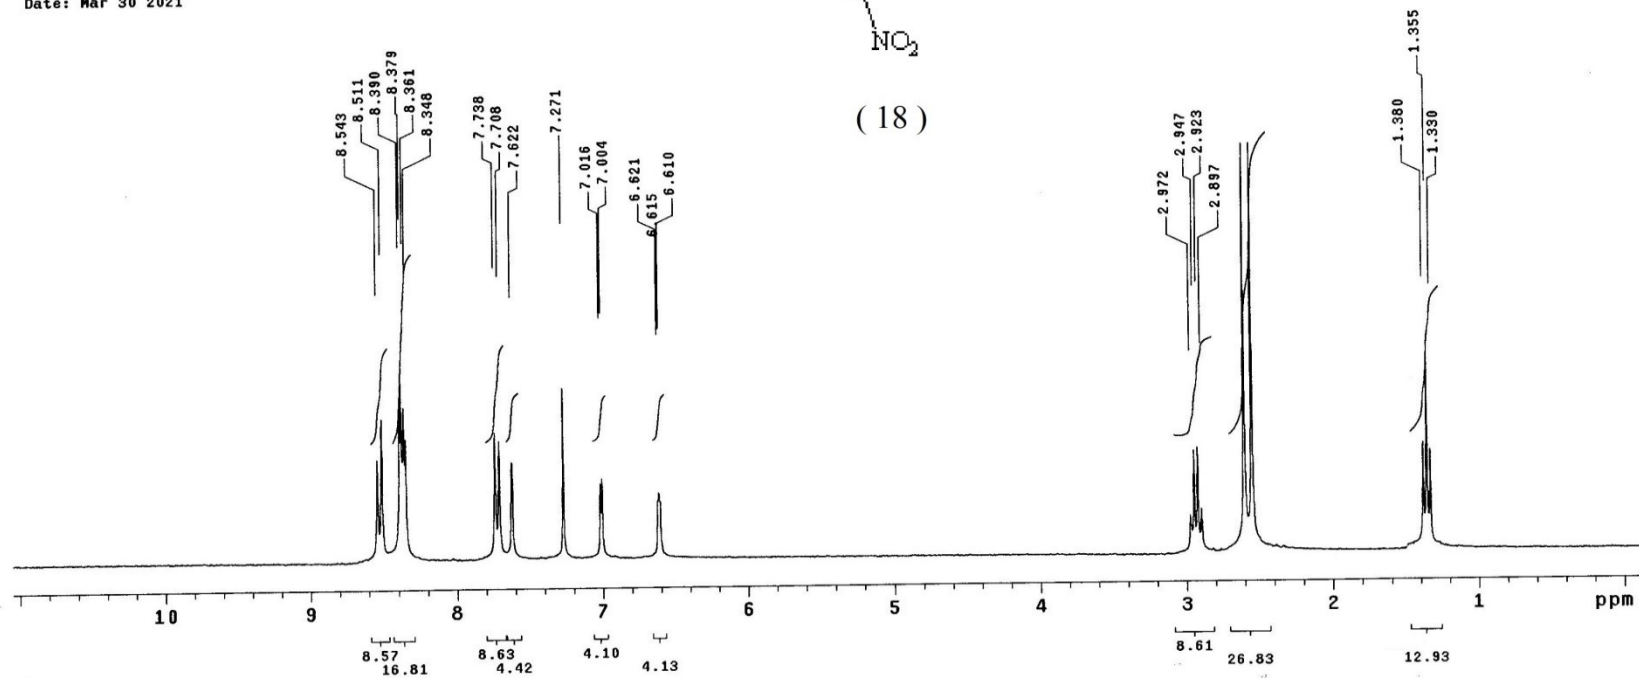

MernaTalat-M23-CDC13-C13

Archive directory: /export/home/vnmr1/vnmrsys/data  
Sample directory: DD5mm\_test\_12Mar2014-21:34:40  
File: PROTON

Pulse Sequence: s2pu1  
Solvent: CDC13  
Ambient temperature  
Mercury-300BB "NMR300"

Pulse 45.0 degrees  
Acq. time 1.707 sec  
Width 18761.7 Hz  
2968 repetitions  
OBSERVE C13, 75.4520074 MHz  
DECOUPLE H1, 300.0688576 MHz  
Power 34 dB  
continuously on  
WALTZ-16 modulated  
DATA PROCESSING  
Line broadening 1.0 Hz  
FT size 65536  
Total time 24 hr, 53 min, 46 sec  
Date: Apr 13 2021

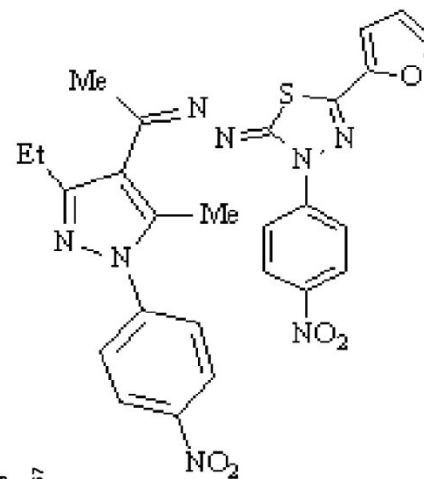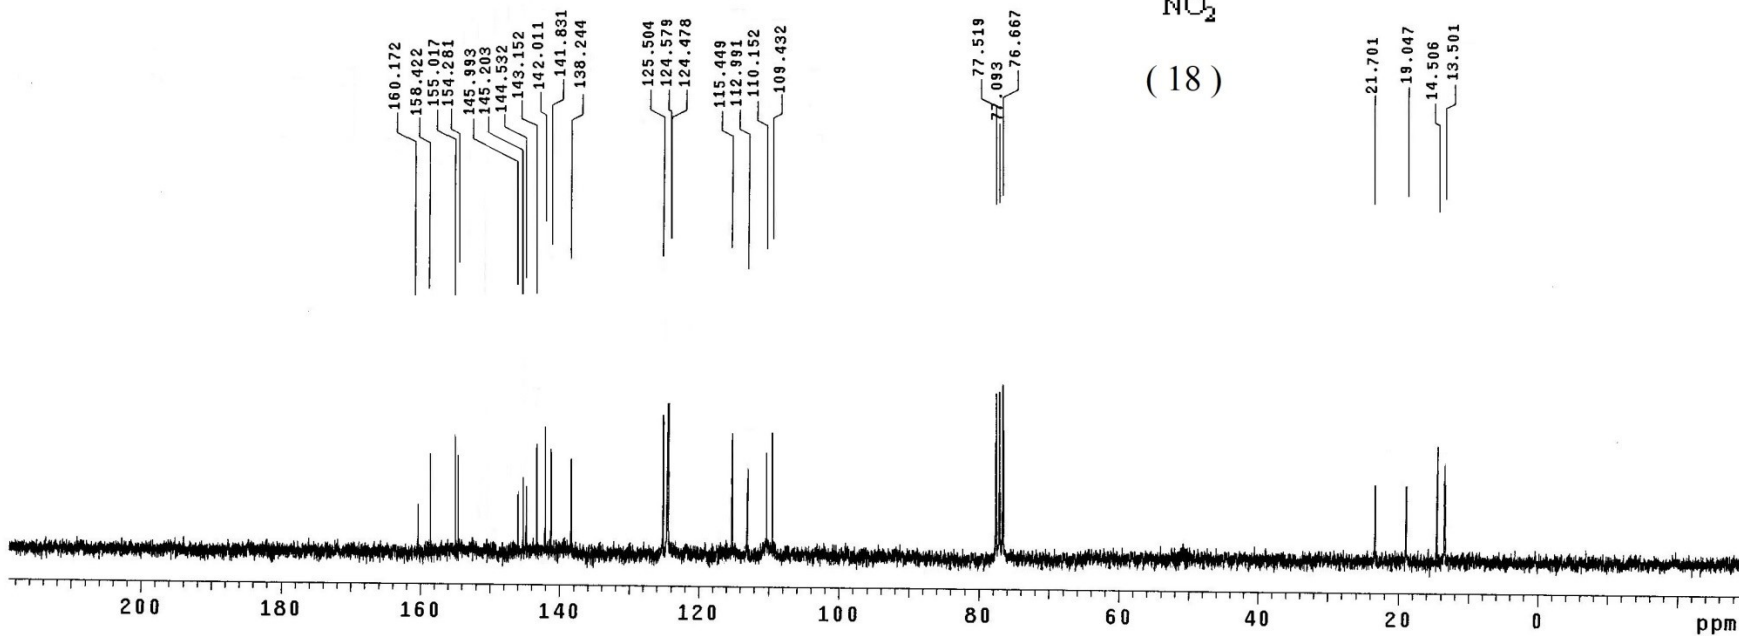



MernaTalat-M25-CDC13-H1

Archive directory: /export/home/vnmr1/vnmrsys/data  
Sample directory: DD5mm\_test\_12Mar2014-21:34:40  
File: PROTON

Pulse Sequence: s2pu1  
Solvent: CDC13  
Temp. 30.0 C / 303.1 K  
Mercury-300BB "NMR300"

Relax. delay 6.000 sec  
Pulse 45.0 degrees  
Acq. time 4.004 sec  
Width 6600.7 Hz  
6 repetitions  
OBSERVE H1, 300.0673637 MHz  
DATA PROCESSING  
Line broadening 0.9 Hz  
FT size 65536  
Total time 58 min, 56 sec  
Date: Mar 30 2021

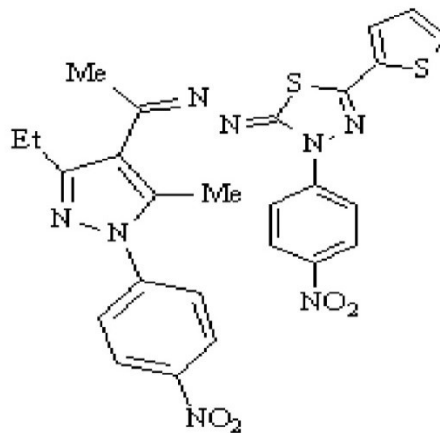

(19)

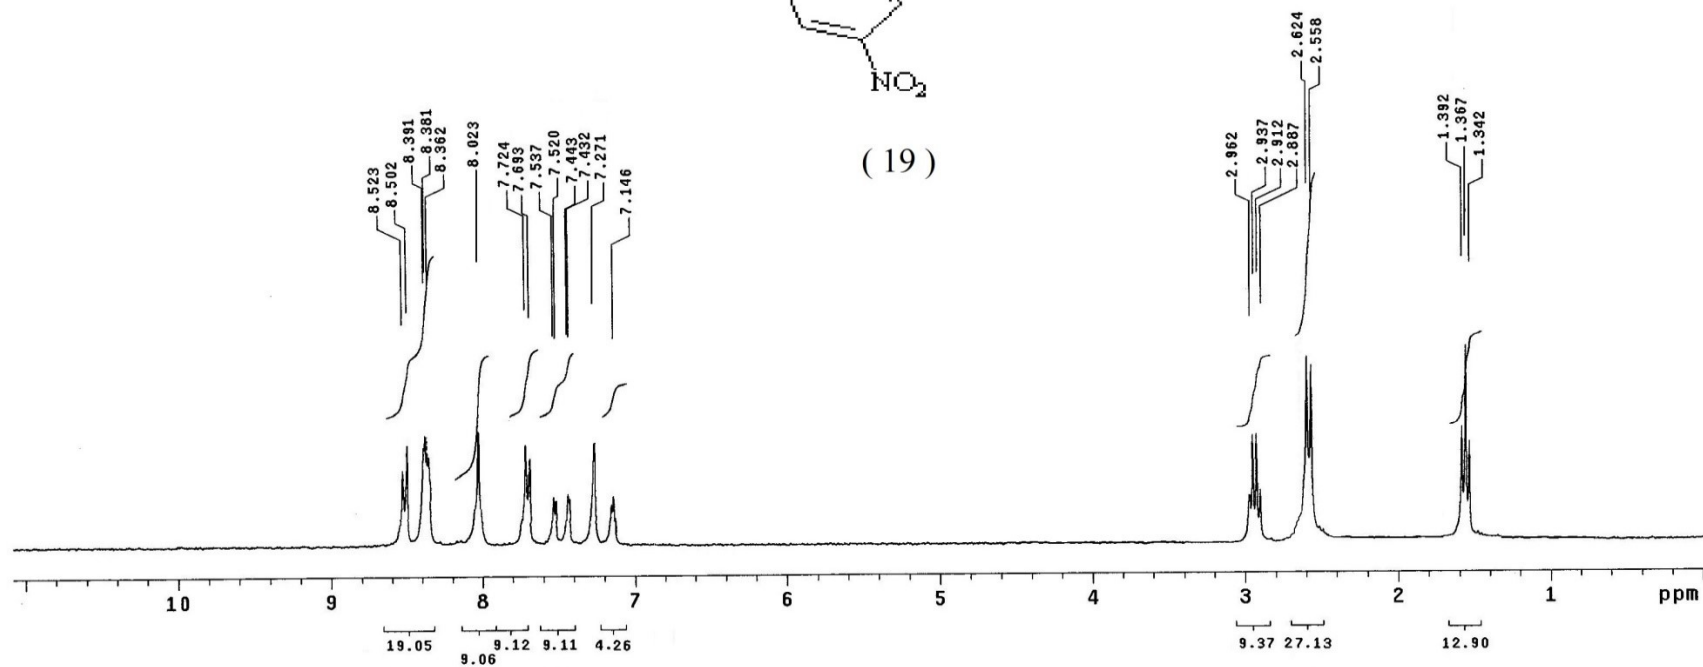

MernaTalaat-M25-CDC13-C13

Archive directory: /export/home/vnmr1/vnmrsys/data  
Sample directory: DD5mm\_test\_12Mar2014-21:34:40  
File: PROTON

Pulse Sequence: s2pu1  
Solvent: CDC13  
Ambient temperature  
Mercury-300BB "NMR300"

Pulse 45.0 degrees  
Acq. time 1.707 sec  
Width 18761.7 Hz  
3064 repetitions  
OBSERVE C13, 75.4520034 MHz  
DECOUPLE H1, 300.0688576 MHz  
Power 34 dB  
continuously on  
WALTZ-16 modulated  
DATA PROCESSING  
Line broadening 1.0 Hz  
FT size 65536  
Total time 31 hr, 7 min, 12 sec  
Date: Aug 30 2021

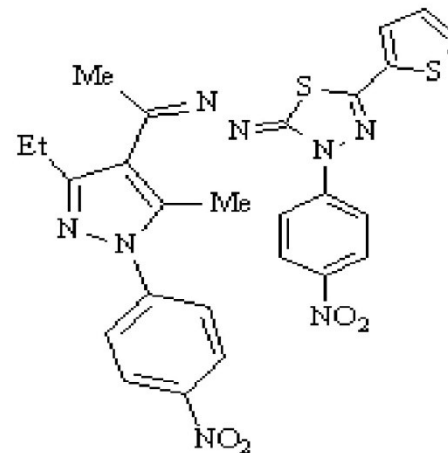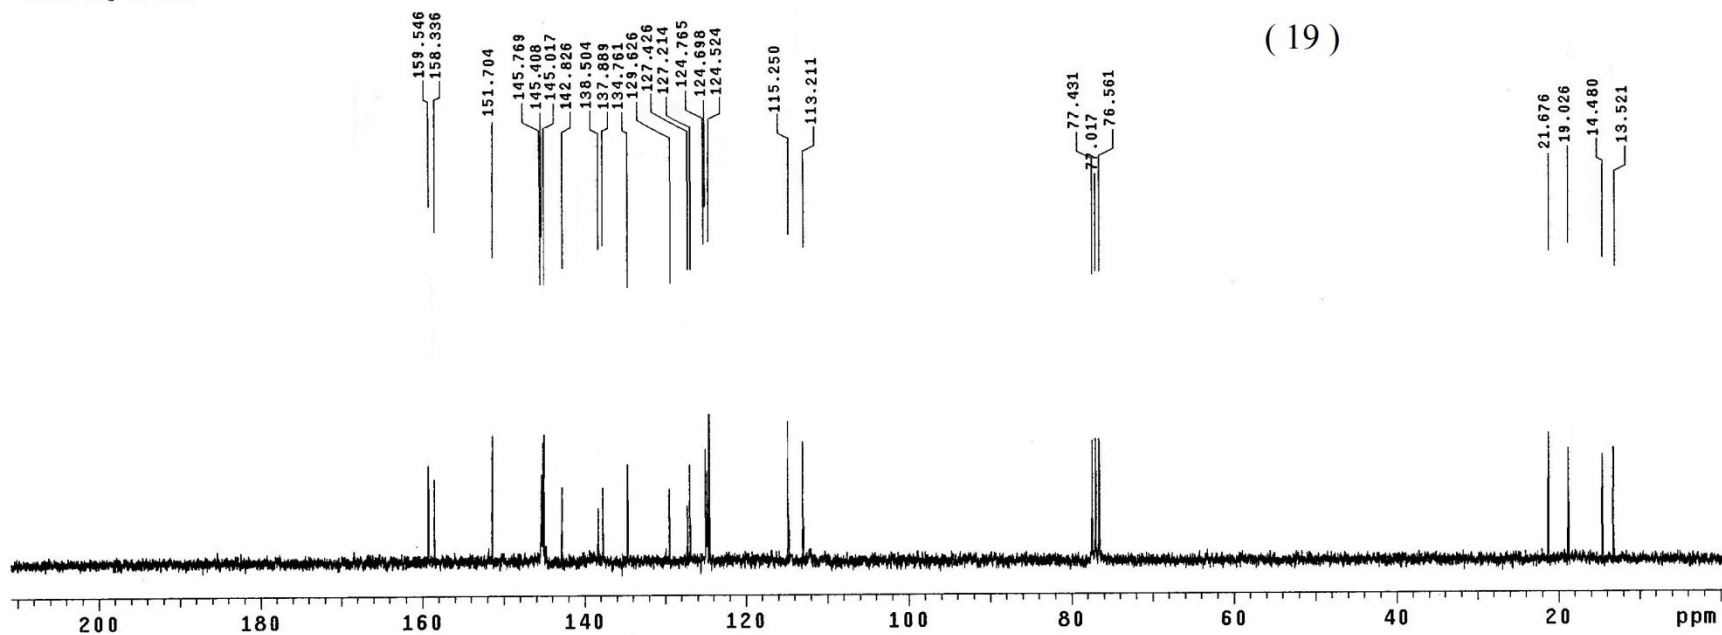

MonicaGameel-M27-CDC13-H1

Archive directory: /export/home/vnmr1/vnmrsys/data  
Sample directory: DD5mm\_test\_12Mar2014-21:34:40  
File: PROTON

Pulse Sequence: s2pu1  
Solvent: CDC13  
Temp. 30.0 C / 303.1 K  
Mercury-300BB "NMR300"

Relax. delay 6.000 sec  
Pulse 45.0 degrees  
Acq. time 4.004 sec  
Width 6600.7 Hz  
39 repetitions  
OBSERVE H1, 300.0673637 MHz  
DATA PROCESSING  
Line broadening 0.9 Hz  
FT size 65536  
Total time 58 min, 56 sec  
Date: Mar 2 2021

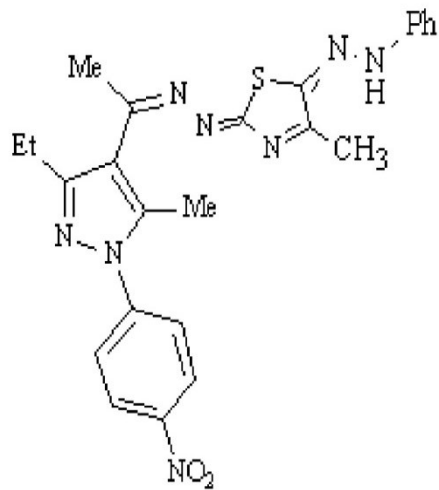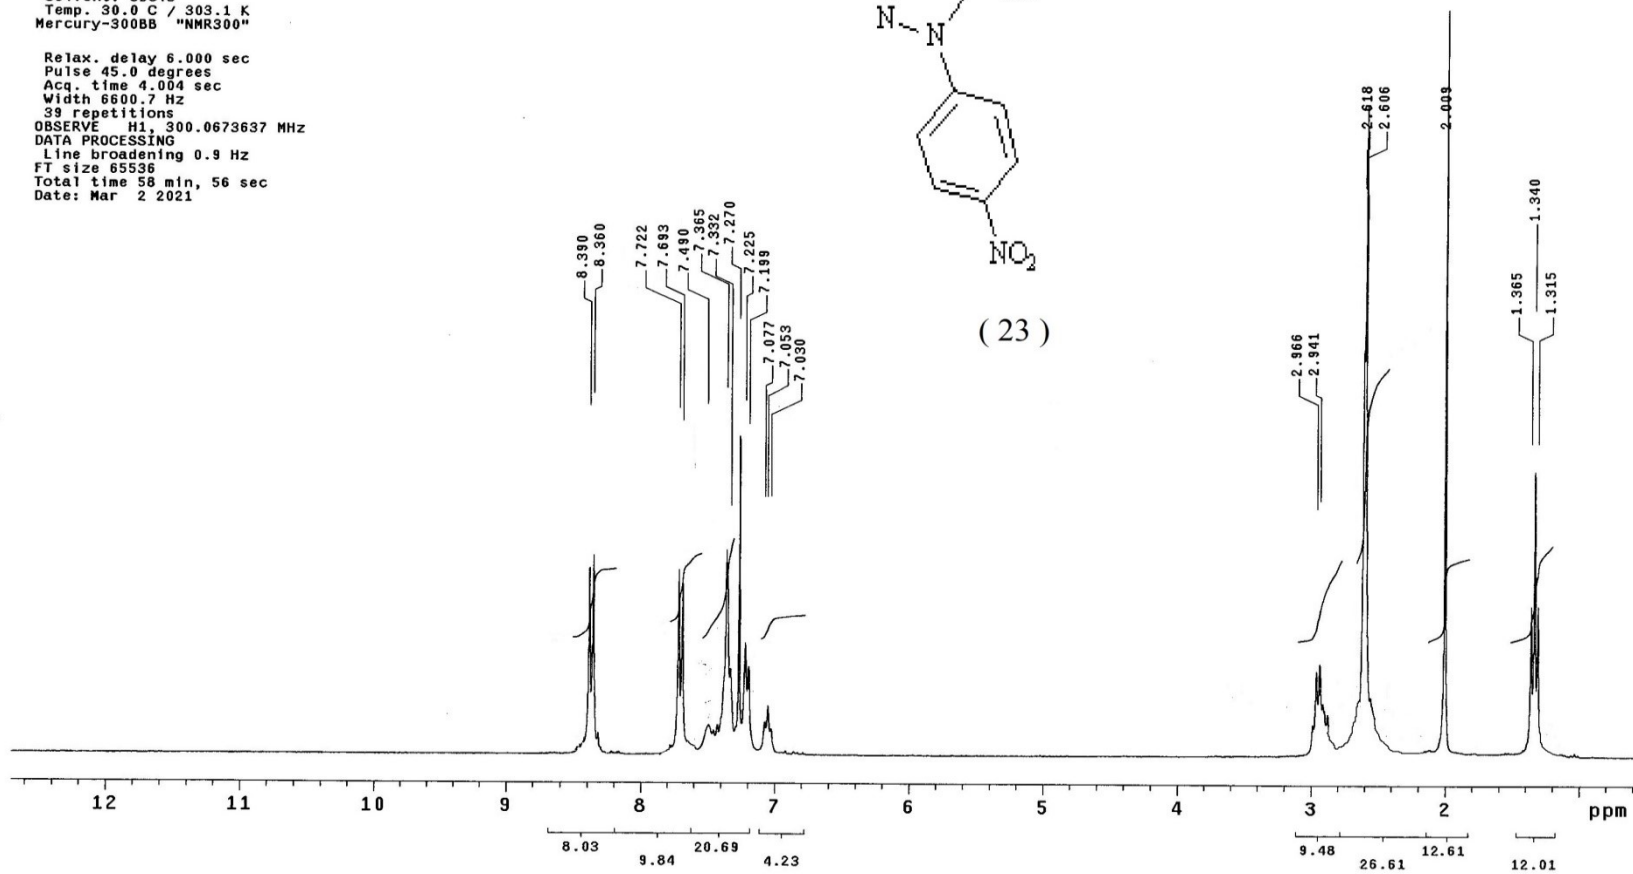

MonicaGamee1-M27-CDC13-C13

Archive directory: /export/home/vnmr1/vnmrsys/data  
Sample directory: DD5mm\_test\_12Mar2014-21:34:40  
File: PROTON

Pulse Sequence: s2pu1

Solvent: CDCl3  
Ambient temperature  
Mercury-300BB "NMR300"

Pulse 45.0 degrees  
Acq. time 1.707 sec  
Width 18761.7 Hz  
2256 repetitions  
OBSERVE C13, 75.4520022 MHz  
DECOUPLE H1, 300.0688576 MHz  
Power 34 dB  
continuously on  
WALTZ-16 modulated  
DATA PROCESSING  
Line broadening 1.0 Hz  
FT size 65536  
Total time 24 hr, 53 min, 46 sec  
Date: Mar 7 2021

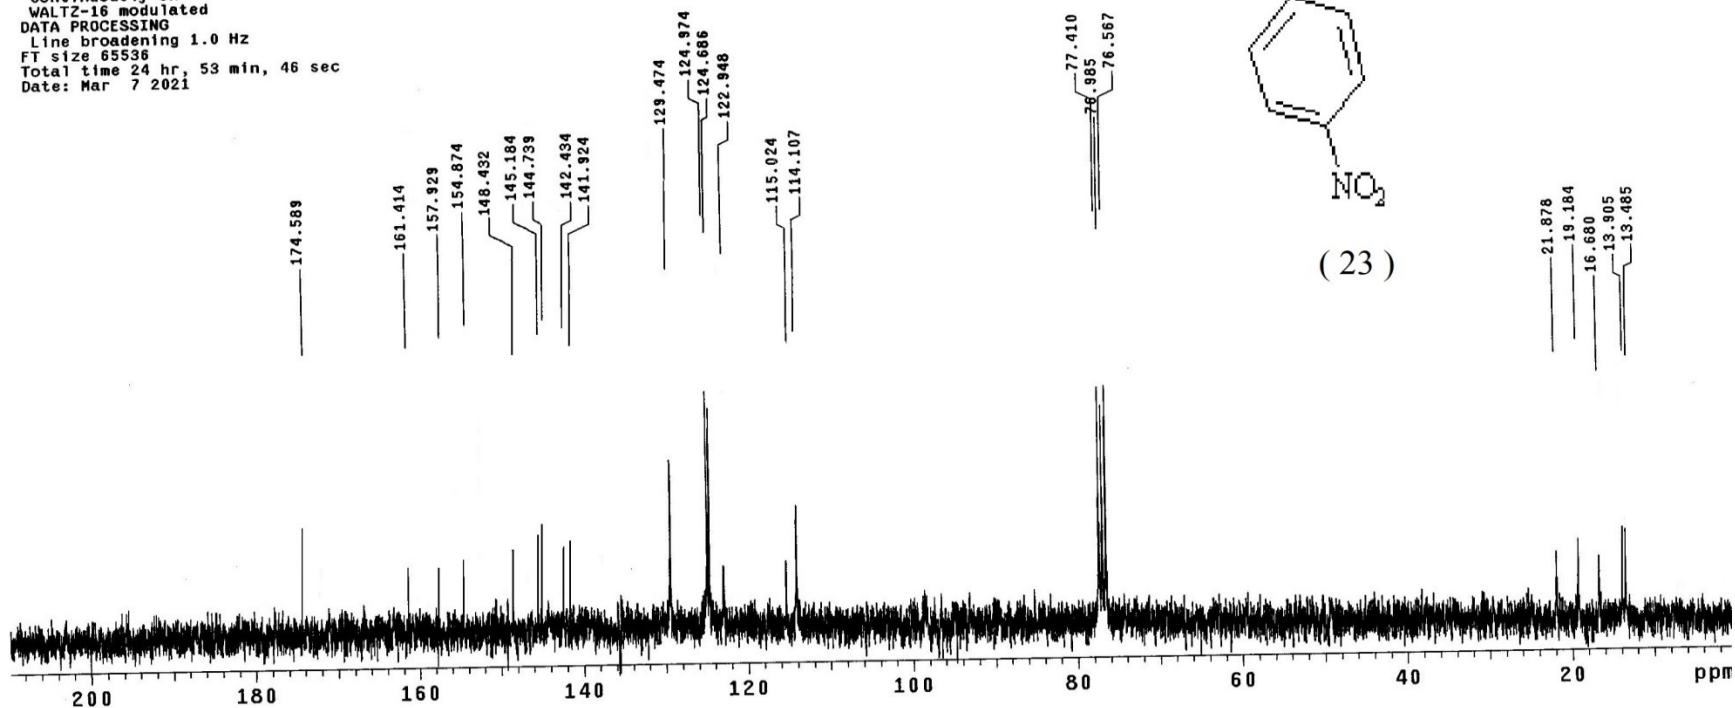

MernaTalat-M28-CDC13-H1

Archive directory: /export/home/vnmr1/vnmrSYS/data  
Sample directory: DD5mm\_test\_12Mar2014-21:34:40  
File: PROTON

Pulse Sequence: s2pu1  
Solvent: CDC13  
Temp. 30.0 C / 303.1 K  
Mercury-300BB "NMR300"

Relax. delay 6.000 sec  
Pulse 45.0 degrees  
Acq. time 4.004 sec  
Width 6600.7 Hz  
33 repetitions  
OBSERVE H1, 300.0673635 MHz  
DATA PROCESSING  
Line broadening 0.9 Hz  
FT size 65536  
Total time 58 min, 56 sec  
Date: Mar 30 2021

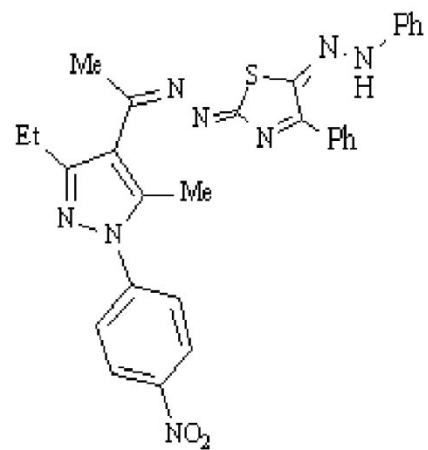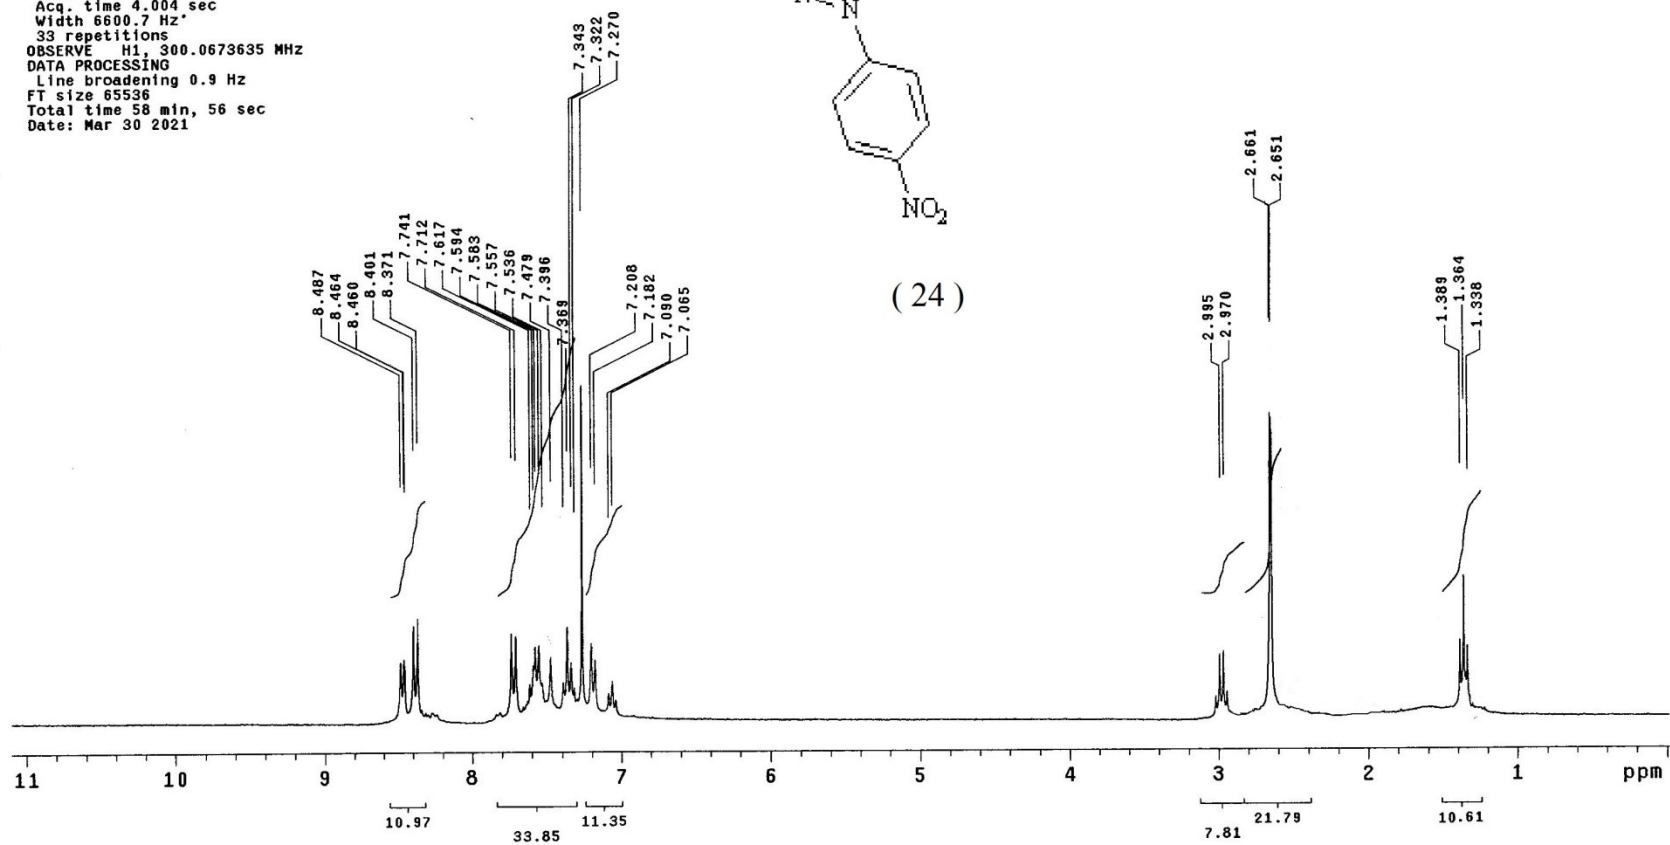

HamdyHasaneen-M28-CDC13-C13

Archive directory: /export/home/vnmr1/vnmrsys/data  
Sample directory: DD5mm\_test\_12Mar2014-21:34:40  
File: PROTON

Pulse Sequence: s2pul  
Solvent: CDC13  
Ambient temperature  
Mercury-300BB "NMR300"

Pulse 45.0 degrees  
Acq. time 1.707 sec  
Width 18761.7 Hz  
1488 repetitions  
OBSERVE C13, 75.4520165 MHz  
DECOUPLE H1, 300.0688576 MHz  
Power 34 dB  
continuously on  
WALTZ-16 modulated  
DATA PROCESSING  
Line broadening 1.0 Hz  
FT size 65536  
Total time 31 hr, 7 min, 12 sec  
Date: Mar 31 2021

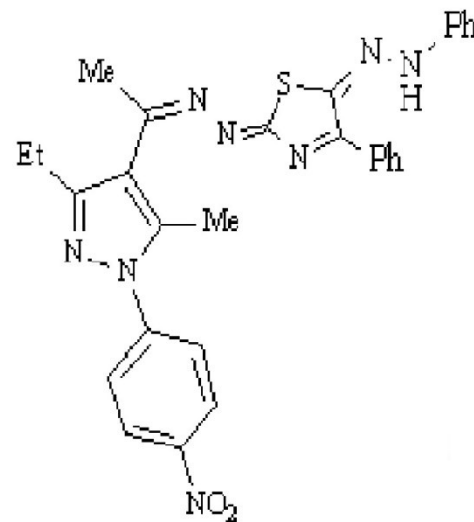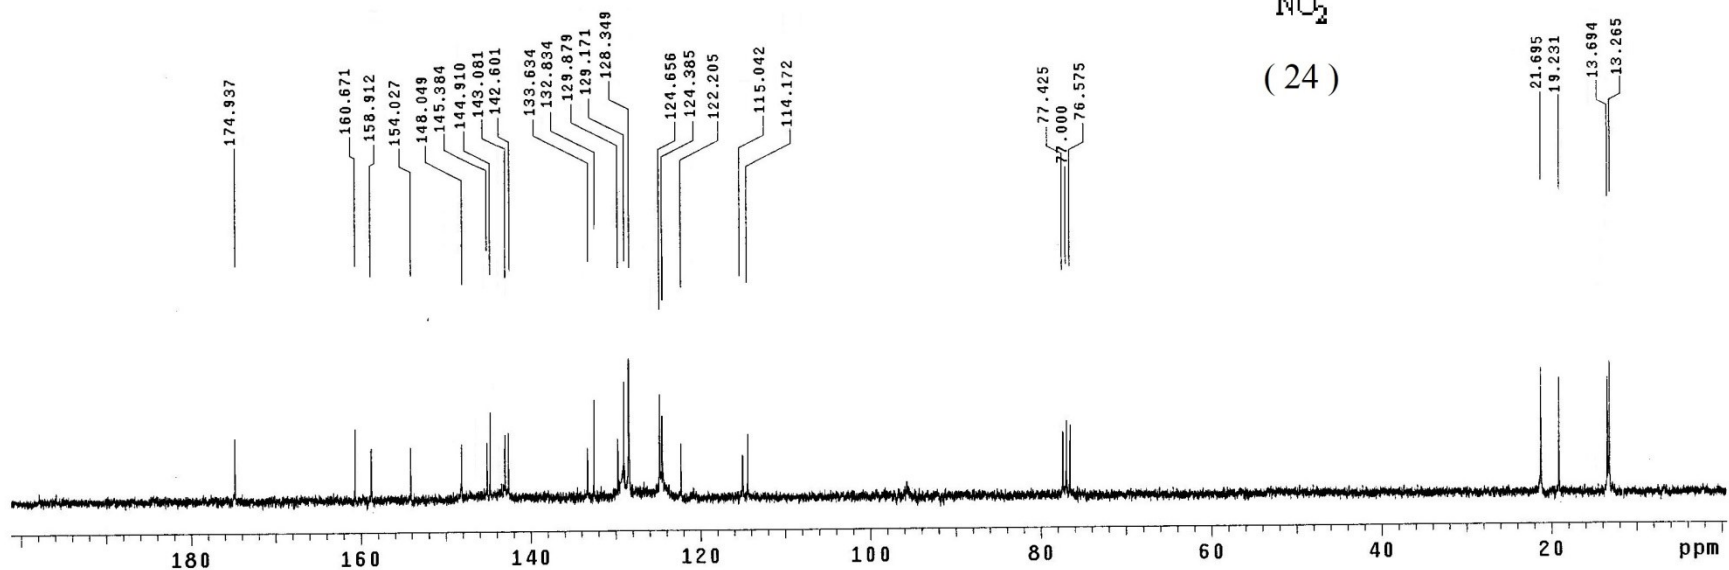

MohammadAbdulMoaty-M29-CDC13-H1

Archive directory: /export/home/vnmr1/vnmrsys/data  
Sample directory: DD5mm\_test\_12Mar2014-21:34:40  
File: PROTON

Pulse Sequence: s2pu1  
Solvent: CDC13  
Temp. 30.0 C / 303.1 K  
Mercury-300BB "NMR300"

Relax. delay 6.000 sec  
Pulse 25.4 degrees  
Acq. time 4.004 sec  
Width 6600.7 Hz  
11 repetitions  
OBSERVE H1, 300.0673637 MHz  
DATA PROCESSING  
Line broadening 1.2 Hz  
FT size 65536  
Total time 58 min, 56 sec  
Date: Jun 16 2022

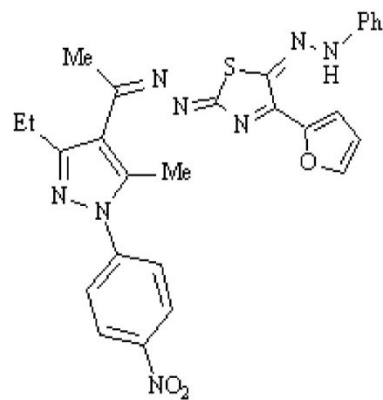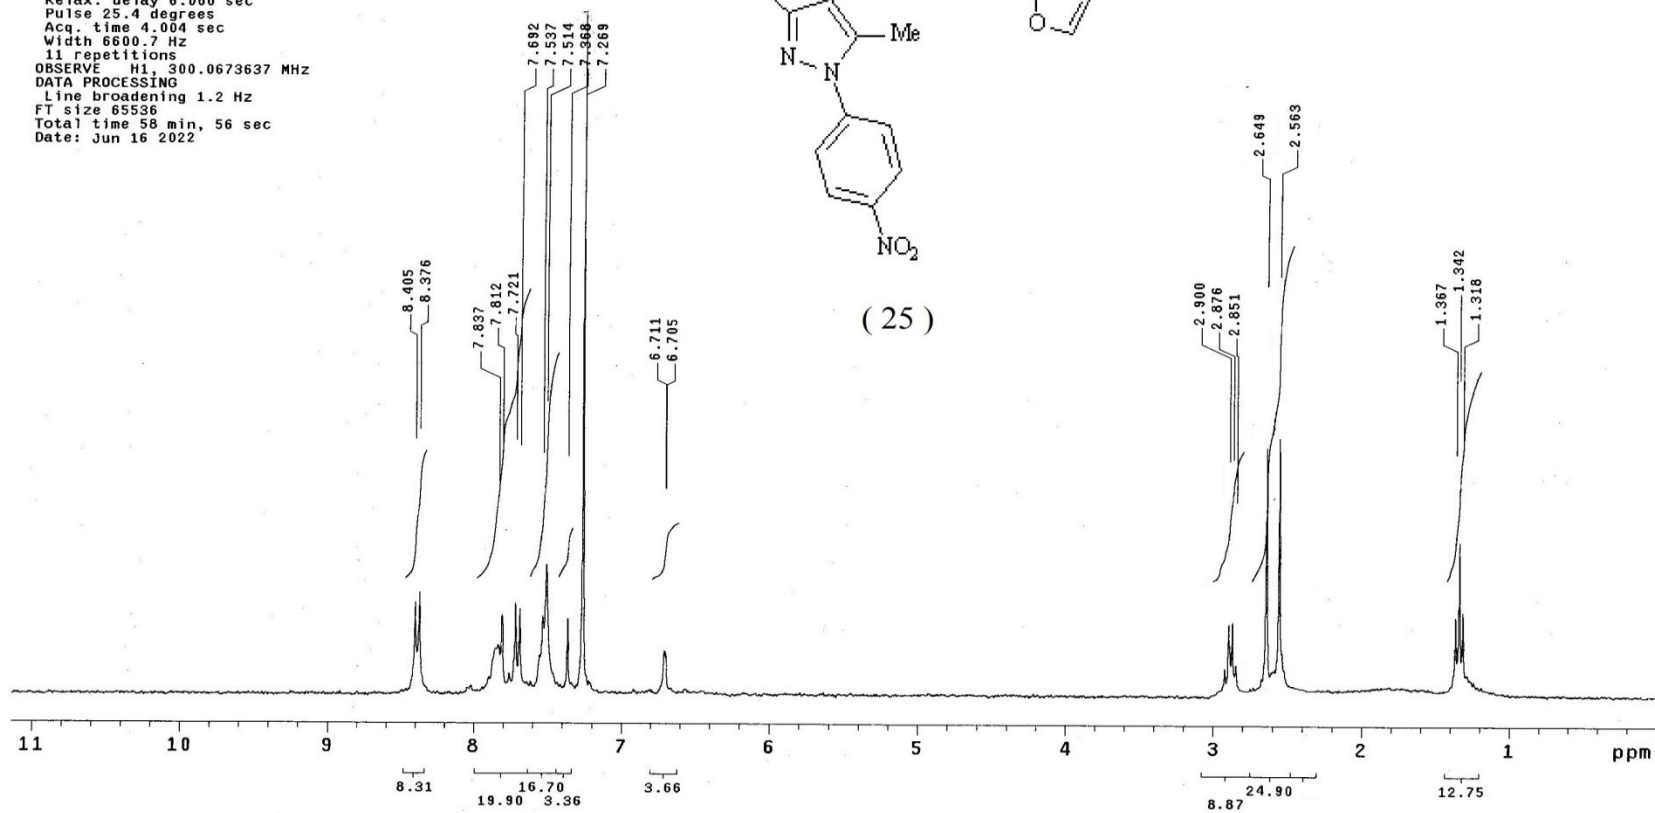

HamdyHasaneen-M29-CDC13-C13

Archive directory: /export/home/vnmr1/vnmrsys/data  
Sample directory: DD5mm\_test\_12Mar2014-21:34:40  
File: PROTON

Pulse Sequence: s2pu1  
Solvent: CDC13  
Ambient temperature  
Mercury-300BB "NMR300"

Pulse 45.0 degrees  
Acq. time 1.707 sec  
Width 18761.7 Hz  
2472 repetitions  
OBSERVE C13, 75.4520034 MHz  
DECOUPLE H1, 300.0688576 MHz  
Power 34 dB  
continuously on  
WALTZ-16 modulated  
DATA PROCESSING  
Line broadening 1.0 Hz  
FT size 65536  
Total time 31 hr, 7 min, 12 sec  
Date: Oct 6 2021

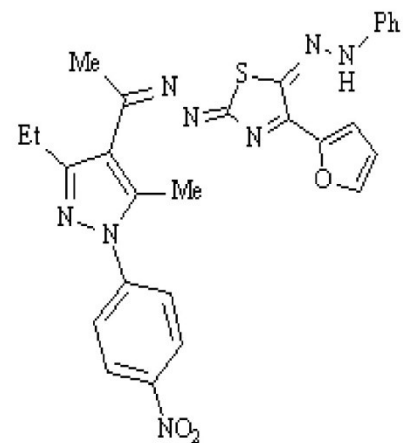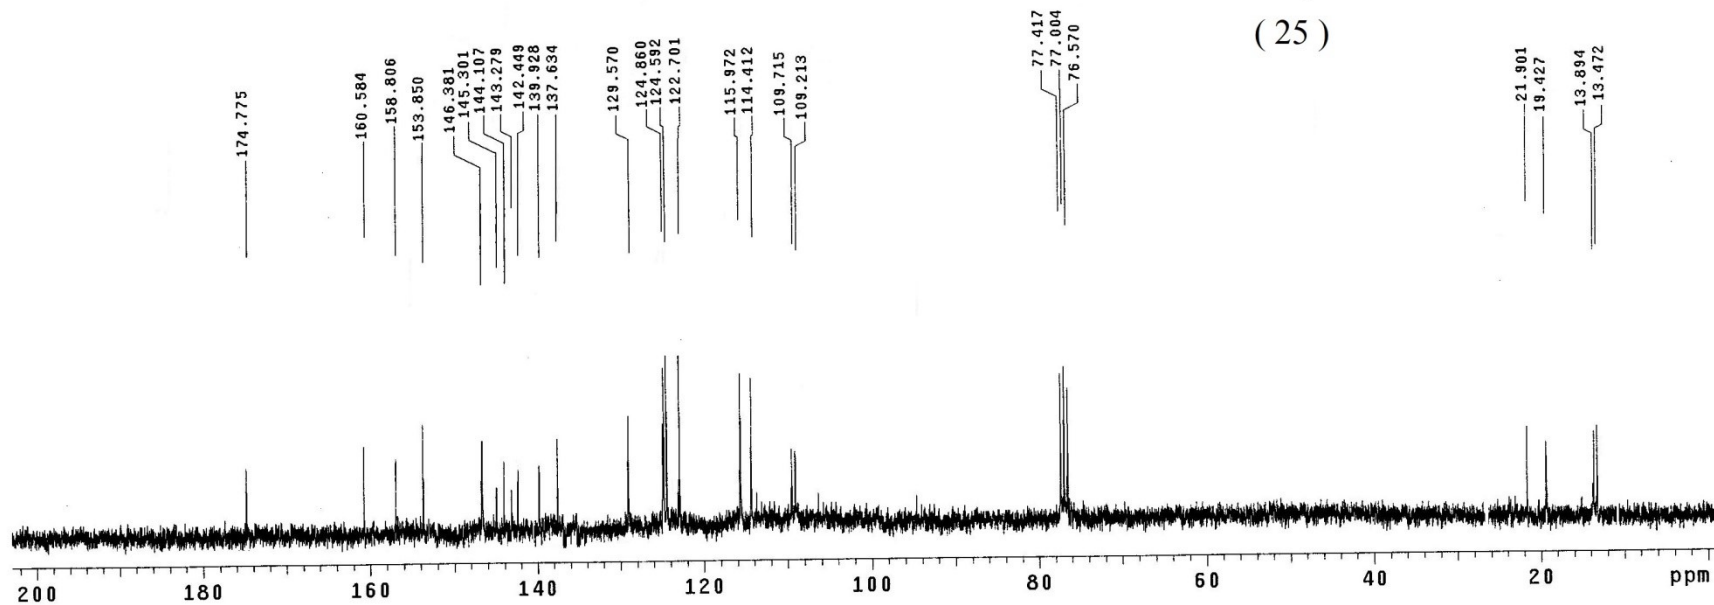



MernaTalat-M40-CDC13-H1

Archive directory: /export/home/vnmr1/vnmrsys/data  
Sample directory: DD5mm\_test\_12Mar2014-21:34:40  
File: PROTON

Pulse Sequence: s2pu1  
Solvent: CDC13  
Temp. 30.0 C / 303.1 K  
Mercury-300BB "NMR300"

Relax. delay 6.000 sec  
Pulse 25.4 degrees  
Acq. time 4.004 sec  
Width 6600.7 Hz  
15 repetitions  
OBSERVE H1, 300.0673637 MHz  
DATA PROCESSING  
Line broadening 0.9 Hz  
FT size 65536  
Total time 58 min, 56 sec  
Date: Aug 18 2021

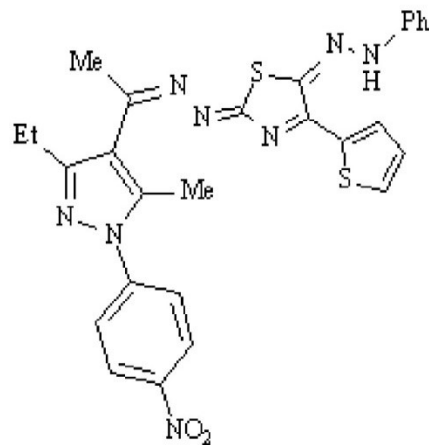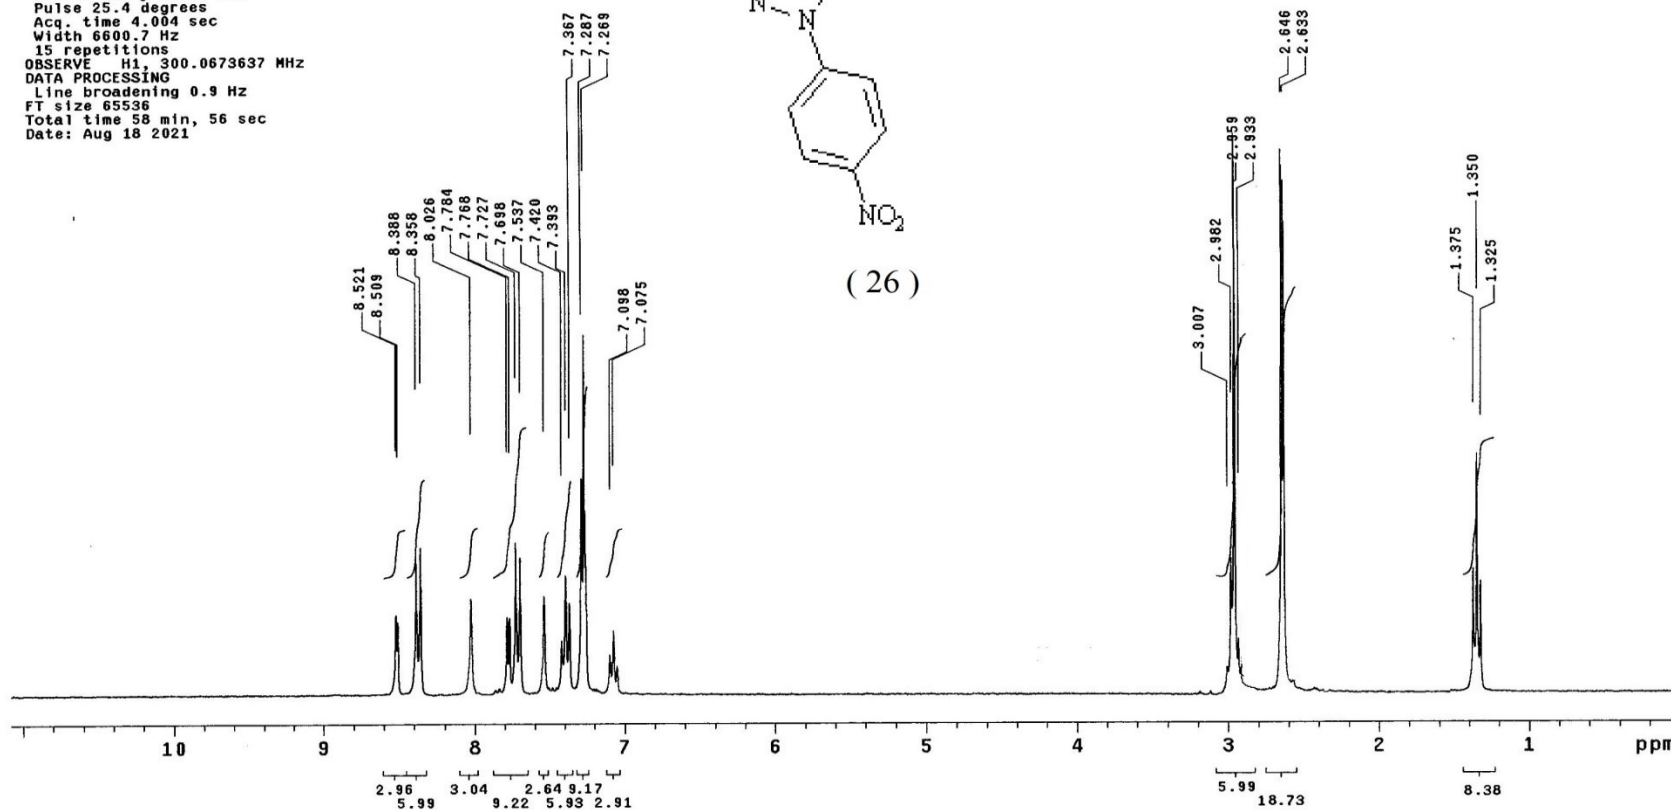

MernaTalat-M40-CDC13-C13

Archive directory: /export/home/vnmr1/vnmrsys/data  
Sample directory: DD5mm\_test\_12Mar2014-21:34:40  
File: PROTON

Pulse Sequence: s2pu1

Solvent: CDC13  
Ambient temperature  
Mercury-300BB "NMR300"

Pulse 45.0 degrees  
Acq. time 1.707 sec  
Width 18761.7 Hz  
5808 repetitions  
OBSERVE C13, 75.4520016 MHz  
DECOUPLE H1, 300.0688576 MHz  
Power 34 dB  
continuously on  
WALTZ-16 modulated  
DATA PROCESSING  
Line broadening 1.0 Hz  
FT size 65536  
Total time 31 hr, 7 min, 12 sec  
Date: Aug 23 2021

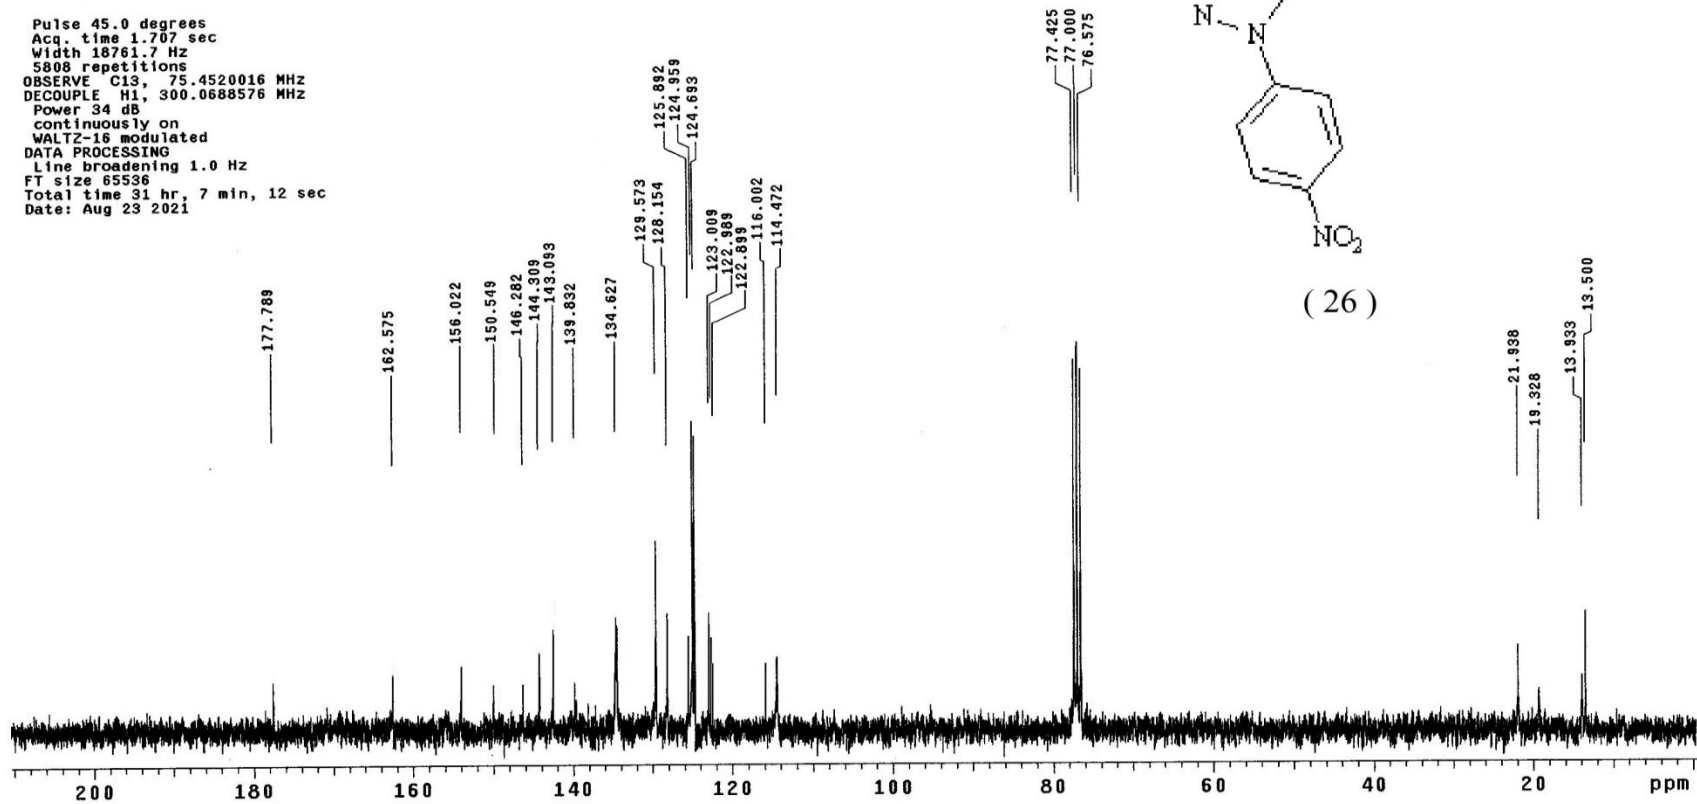

Line#:1 R.Time:3.9(Scan#:464)  
 MassPeaks:313  
 RawMode:Single 3.9(464) BasePeak:361(5033470)  
 BG Mode:None Group 1 - Event 1

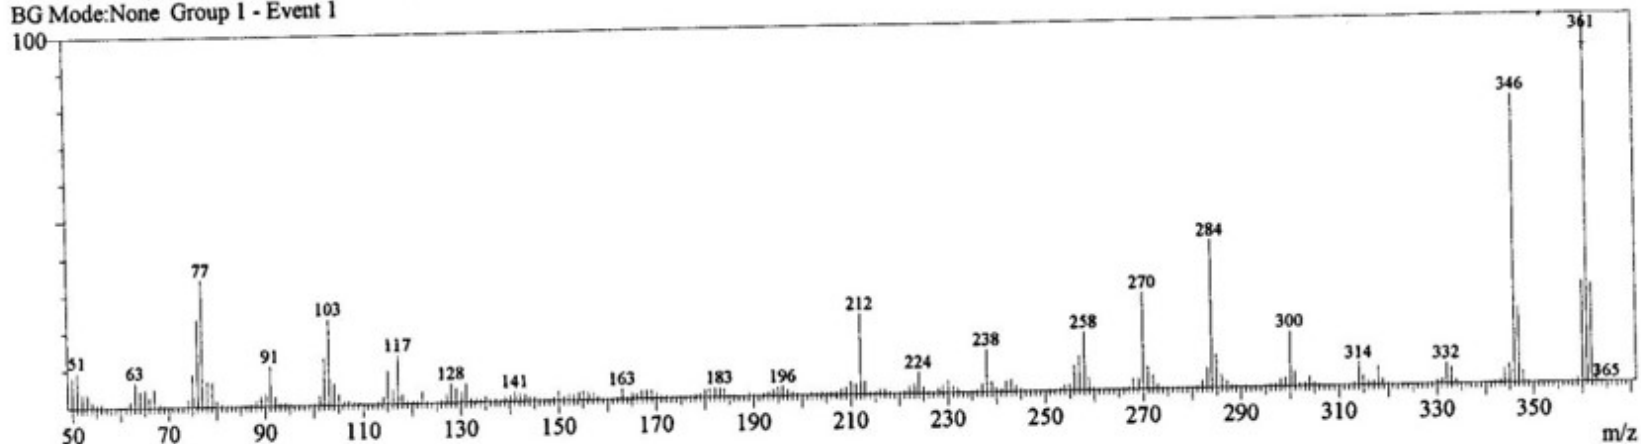

Mass Table

Line#:1 R.Time:3.9(Scan#:464)  
 MassPeaks:313  
 RawMode:Single 3.9(464) BasePeak:361(5033470)  
 BG Mode:None Group 1 - Event 1

| # | m/z   | Abs. In | Rel. Int. | # | m/z   | Abs. In | Rel. Int. | # | m/z   | Abs. In | Rel. Int. |
|---|-------|---------|-----------|---|-------|---------|-----------|---|-------|---------|-----------|
| 1 | 50.05 | 403995  | 8.03      | 4 | 53.05 | 180497  | 3.59      | 7 | 56.05 | 55906   | 1.11      |
| 2 | 51.00 | 482354  | 9.58      | 5 | 54.05 | 82369   | 1.64      | 8 | 57.10 | 18018   | 0.36      |
| 3 | 52.05 | 189657  | 3.77      | 6 | 55.05 | 52016   | 1.03      | 9 | 58.05 | 2991    | 0.06      |

Mass spectrometry of compound 4.

Line#:1 R.Time:2.5(Scan#:306)  
 MassPeaks:328  
 RawMode:Single 2.5(306) BasePeak:375(2324311)  
 BG Mode:None Group 1 - Event 1

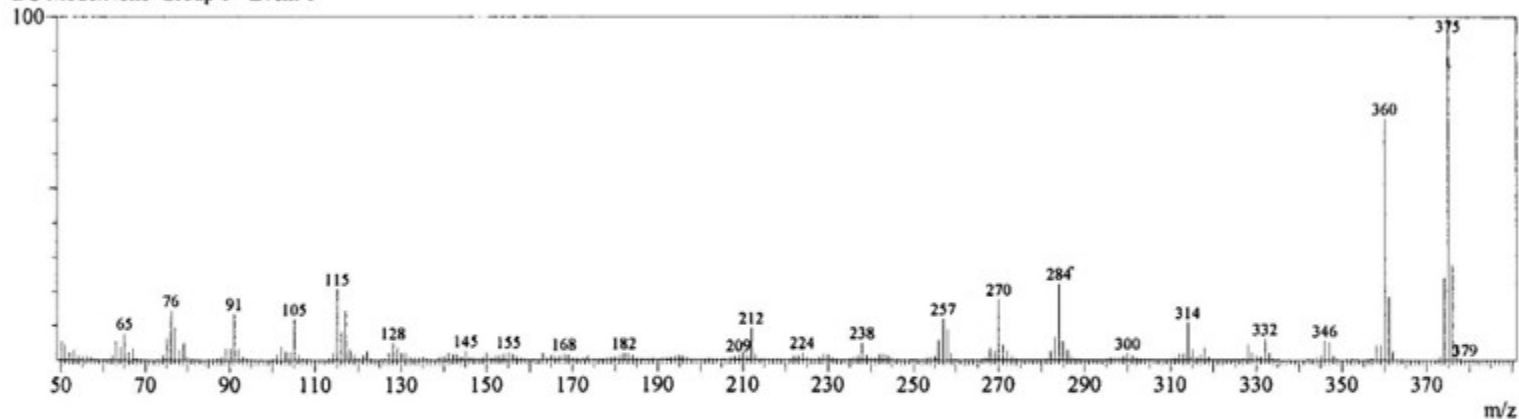

Mass Table

Line#:1 R.Time:2.5(Scan#:306)  
 MassPeaks:328  
 RawMode:Single 2.5(306) BasePeak:375(2324311)  
 BG Mode:None Group 1 - Event 1

| # | m/z   | Abs. In | Rel. Int. | # | m/z   | Abs. In | Rel. Int. | # | m/z   | Abs. In | Rel. Int. |
|---|-------|---------|-----------|---|-------|---------|-----------|---|-------|---------|-----------|
| 1 | 50.05 | 130298  | 5.61      | 4 | 53.05 | 68307   | 2.94      | 7 | 56.10 | 26516   | 1.14      |
| 2 | 51.05 | 102015  | 4.39      | 5 | 54.10 | 32065   | 1.38      | 8 | 57.10 | 19106   | 0.82      |
| 3 | 52.05 | 55471   | 2.39      | 6 | 55.05 | 29480   | 1.27      | 9 | 58.00 | 4439    | 0.19      |

Mass spectrometry of compound 7.

Line#:1 R.Time:3.2(Scan#:381)  
 MassPeaks:366  
 RawMode:Single 3.2(381) BasePeak:390(6439162)  
 BG Mode:None Group 1 - Event 1

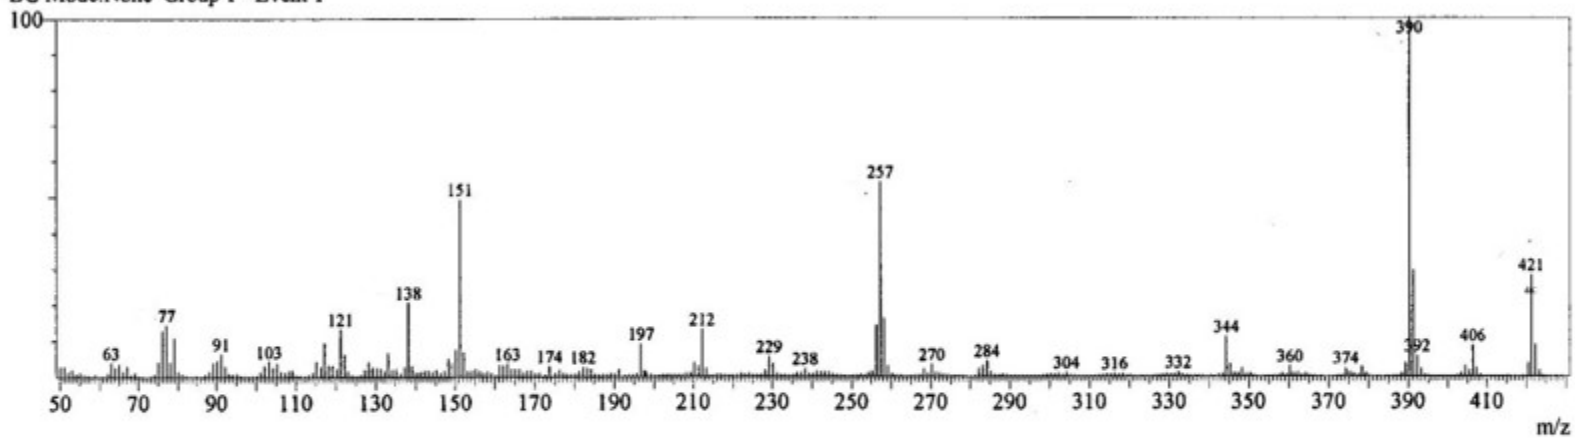

Mass Table

Line#:1 R.Time:3.2(Scan#:381)

MassPeaks:366

RawMode:Single 3.2(381) BasePeak:390(6439162)

BG Mode:None Group 1 - Event 1

| # | m/z   | Abs. In | Rel. Int. | # | m/z   | Abs. In | Rel. Int. | # | m/z   | Abs. In | Rel. Int. |
|---|-------|---------|-----------|---|-------|---------|-----------|---|-------|---------|-----------|
| 1 | 50.05 | 171915  | 2.67      | 4 | 53.10 | 113916  | 1.77      | 7 | 56.10 | 39190   | 0.61      |
| 2 | 51.05 | 179539  | 2.79      | 5 | 54.10 | 52082   | 0.81      | 8 | 57.10 | 25751   | 0.40      |
| 3 | 52.10 | 83591   | -1.30     | 6 | 55.05 | 77956   | 1.21      | 9 | 58.15 | 4574    | 0.07      |

Mass spectrometry of compound 9.

Line#:1 R.Time:2.1(Scan#:255)  
 MassPeaks:279  
 RawMode:Single 2.1(255) BasePeak:225(289166)  
 BG Mode:None Group 1 - Event 1

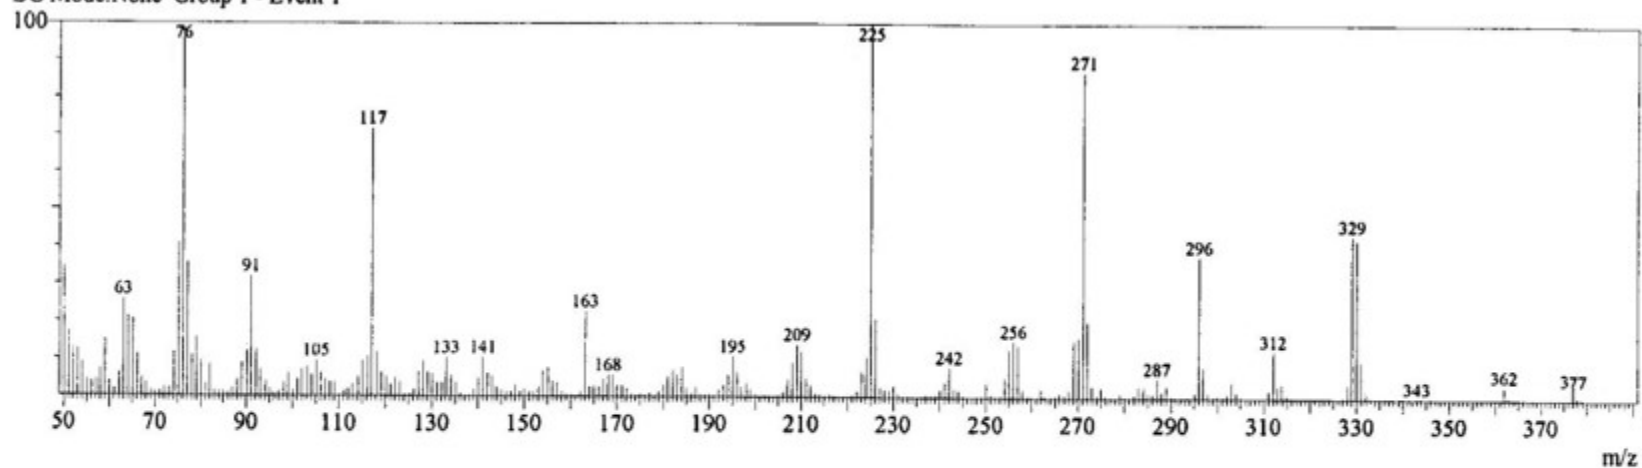

Mass Table

Line#:1 R.Time:2.1(Scan#:255)  
 MassPeaks:279  
 RawMode:Single 2.1(255) BasePeak:225(289166)  
 BG Mode:None Group 1 - Event 1

| # | m/z   | Abs. In | Rel. Int. | # | m/z   | Abs. In | Rel. Int. | # | m/z   | Abs. In | Rel. Int. |
|---|-------|---------|-----------|---|-------|---------|-----------|---|-------|---------|-----------|
| 1 | 50.00 | 100018  | 34.59     | 4 | 53.05 | 36340   | 12.57     | 7 | 56.10 | 11215   | 3.88      |
| 2 | 51.05 | 49651   | 17.17     | 5 | 54.05 | 26017   | 9.00      | 8 | 57.05 | 12186   | 4.21      |
| 3 | 52.05 | 37384   | 12.93     | 6 | 55.10 | 13516   | 4.67      | 9 | 58.00 | 20849   | 7.21      |

Mass spectrometry of compound 13.

Line#:1 R.Time:2.1(Scan#:254)  
 MassPeaks:289  
 RawMode:Single 2.1(254) BasePeak:60(423030)  
 BG Mode:None Group 1 - Event 1

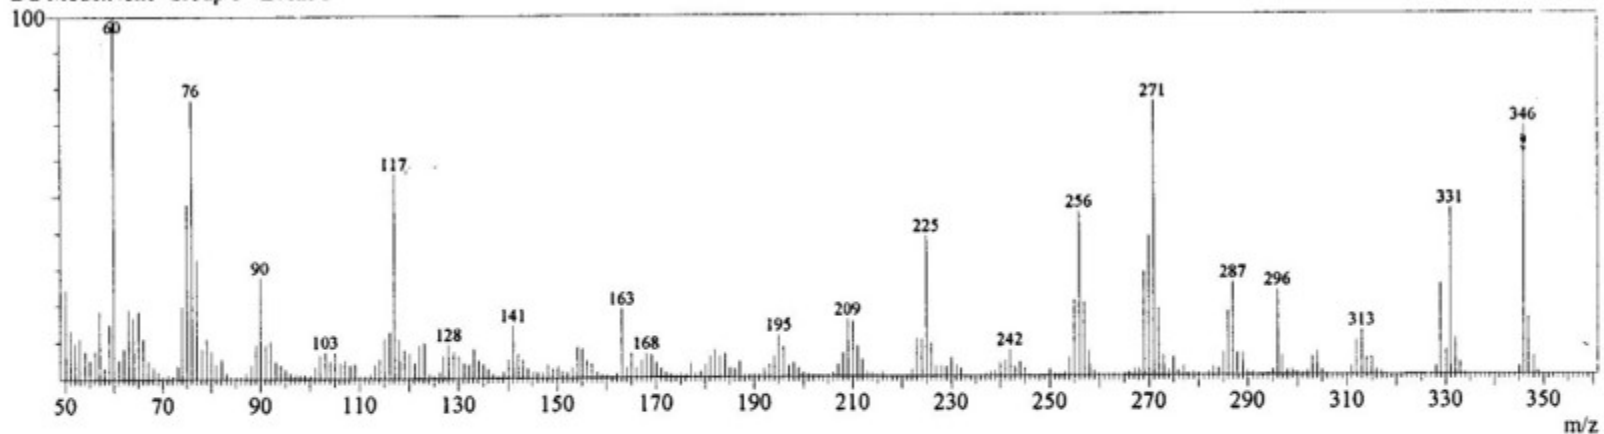

Mass Table

Line#:1 R.Time:2.1(Scan#:254)  
 MassPeaks:289  
 RawMode:Single 2.1(254) BasePeak:60(423030)  
 BG Mode:None Group 1 - Event 1

| # | m/z   | Abs. In | Rel. Int. | # | m/z   | Abs. In | Rel. Int. | # | m/z   | Abs. In | Rel. Int. |
|---|-------|---------|-----------|---|-------|---------|-----------|---|-------|---------|-----------|
| 1 | 50.05 | 103272  | 24.41     | 4 | 53.05 | 47124   | 11.14     | 7 | 56.10 | 32281   | 7.63      |
| 2 | 51.05 | 56509   | 13.36     | 5 | 54.05 | 31940   | 7.55      | 8 | 57.05 | 78022   | 18.44     |
| 3 | 52.05 | 40823   | 9.65      | 6 | 55.10 | 21977   | 5.20      | 9 | 58.05 | 13451   | 3.18      |

Mass spectrometry of compound 14.

Line#:1 R.Time:3.6(Scan#:429)  
 MassPeaks:332  
 RawMode:Single 3.6(429) BasePeak:91(452497)  
 BG Mode:None Group 1 - Event 1

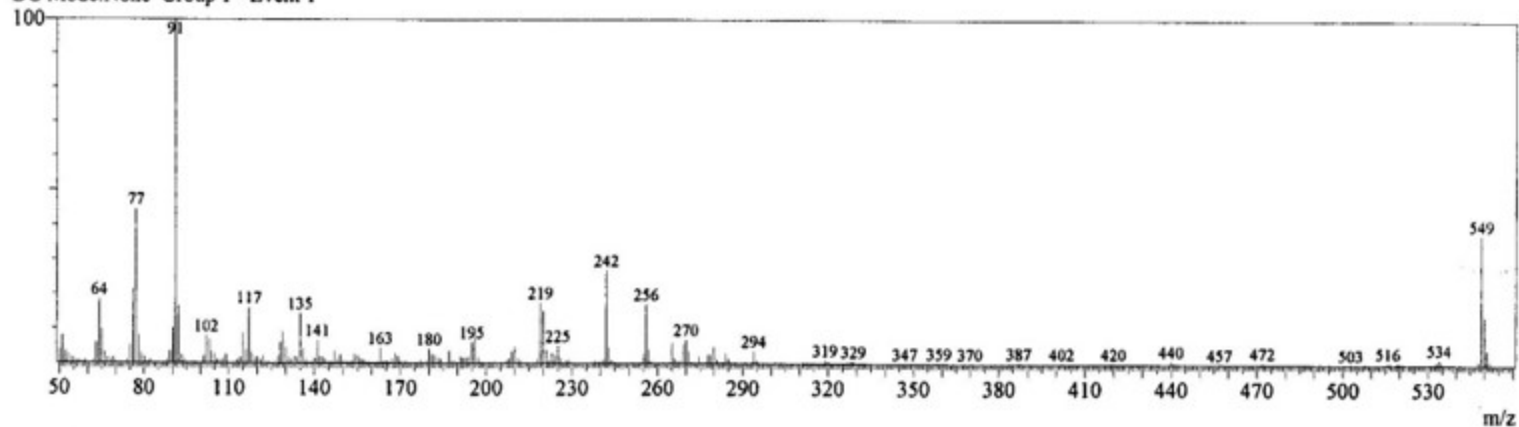

Mass Table

Line#:1 R.Time:3.6(Scan#:429)  
 MassPeaks:332  
 RawMode:Single 3.6(429) BasePeak:91(452497)  
 BG Mode:None Group 1 - Event 1

| # | m/z   | Abs. In | Rel. Int. | # | m/z   | Abs. In | Rel. Int. | # | m/z   | Abs. In | Rel. Int. |
|---|-------|---------|-----------|---|-------|---------|-----------|---|-------|---------|-----------|
| 1 | 50.05 | 17536   | 3.88      | 4 | 53.05 | 11440   | 2.53      | 7 | 56.10 | 4516    | 1.00      |
| 2 | 51.05 | 35963   | 7.95      | 5 | 54.05 | 7970    | 1.76      | 8 | 57.05 | 3855    | 0.85      |
| 3 | 52.05 | 15270   | 3.37      | 6 | 55.05 | 6859    | 1.52      | 9 | 58.05 | 1760    | 0.39      |

Mass spectrometry of compound 17.



Line#:1 R.Time:3.8(Scan#:451)  
 MassPeaks:458  
 RawMode:Single 3.8(451) BasePeak:558(1674935)  
 BG Mode:None Group 1 - Event 1

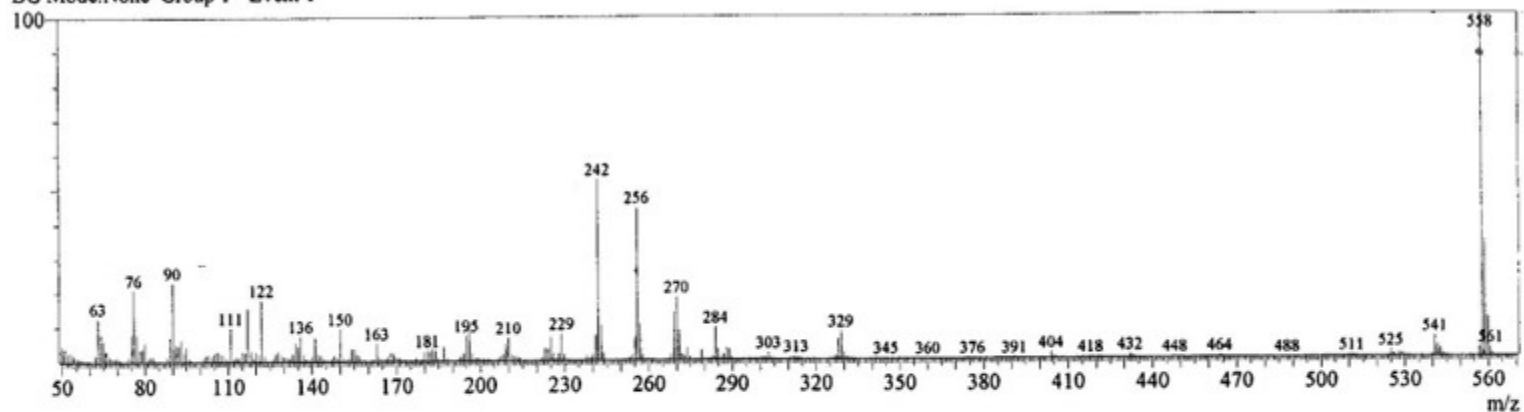

Mass Table

Line#:1 R.Time:3.8(Scan#:451)  
 MassPeaks:458  
 RawMode:Single 3.8(451) BasePeak:558(1674935)  
 BG Mode:None Group 1 - Event 1

| # | m/z   | Abs. In | Rel. Int. | # | m/z   | Abs. In | Rel. Int. |
|---|-------|---------|-----------|---|-------|---------|-----------|
| 1 | 50.05 | 73865   | 4.41      | 4 | 53.05 | 46038   | 2.75      |
| 2 | 51.05 | 61739   | 3.69      | 5 | 54.05 | 28966   | 1.73      |
| 3 | 52.05 | 40734   | 2.43      | 6 | 55.05 | 22633   | 1.35      |
|   |       |         |           | 7 | 56.05 | 14331   | 0.86      |
|   |       |         |           | 8 | 57.05 | 11224   | 0.67      |
|   |       |         |           | 9 | 58.00 | 7087    | 0.42      |

Mass spectrometry of compound 18.

Line#:1 R.Time:3.9(Scan#:465)  
 MassPeaks:479  
 RawMode:Single 3.9(465) BasePeak:574(1105230)  
 BG Mode:None Group 1 - Event 1

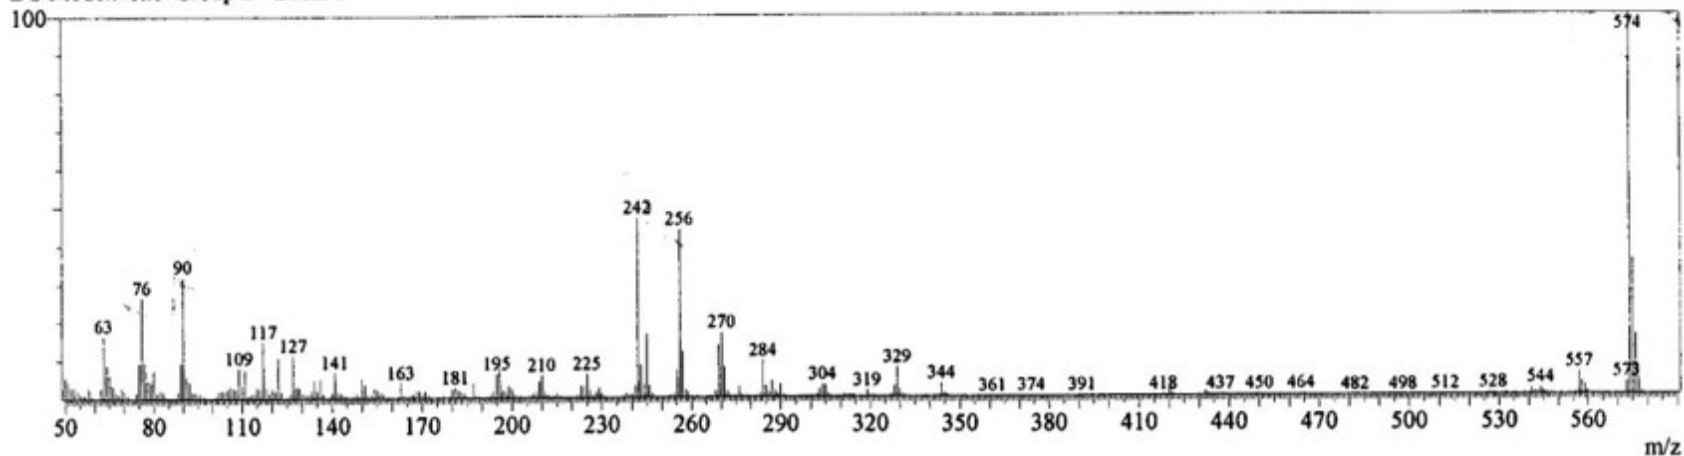

Mass Table

Line#:1 R.Time:3.9(Scan#:465)  
 MassPeaks:479  
 RawMode:Single 3.9(465) BasePeak:574(1105230)  
 BG Mode:None Group 1 - Event 1

| # | m/z   | Abs. In | Rel. Int. | # | m/z   | Abs. In | Rel. Int. | # | m/z   | Abs. In | Rel. Int. |
|---|-------|---------|-----------|---|-------|---------|-----------|---|-------|---------|-----------|
| 1 | 50.05 | 60149   | 5.44      | 4 | 53.05 | 34412   | 3.11      | 7 | 56.10 | 10642   | 0.96      |
| 2 | 51.05 | 48788   | 4.41      | 5 | 54.10 | 23186   | 2.10      | 8 | 57.05 | 9888    | 0.89      |
| 3 | 52.05 | 34338   | 3.11      | 6 | 55.10 | 13017   | 1.18      | 9 | 58.00 | 33687   | 3.05      |

Mass spectrometry of compound 19.

Line#:1 R.Time:2.4(Scan#:290)  
 MassPeaks:289  
 RawMode:Single 2.4(290) BasePeak:77(167234)  
 BG Mode:None Group 1 - Event 1

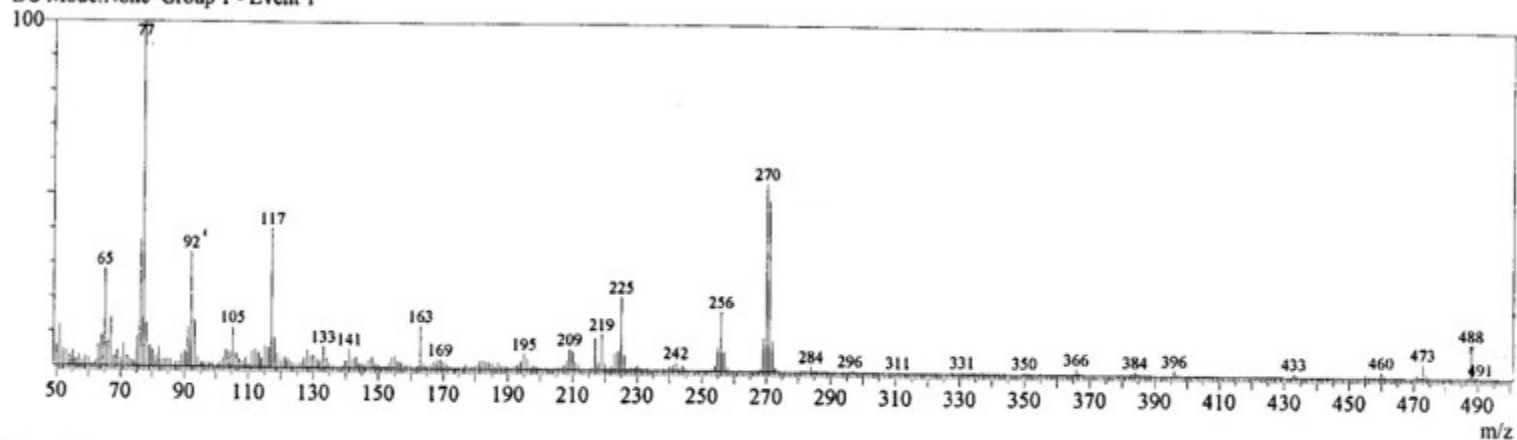

Mass Table

Line#:1 R.Time:2.4(Scan#:290)  
 MassPeaks:289  
 RawMode:Single 2.4(290) BasePeak:77(167234)  
 BG Mode:None Group 1 - Event 1

| # | m/z   | Abs. In | Rel. Int. | # | m/z   | Abs. In | Rel. Int. | # | m/z   | Abs. In | Rel. Int. |
|---|-------|---------|-----------|---|-------|---------|-----------|---|-------|---------|-----------|
| 1 | 50.00 | 9914    | 5.93      | 4 | 53.05 | 7429    | 4.44      | 7 | 56.05 | 3812    | 2.28      |
| 2 | 51.00 | 20022   | 11.97     | 5 | 54.05 | 5722    | 3.42      | 8 | 57.05 | 5633    | 3.37      |
| 3 | 52.05 | 8420    | 5.03      | 6 | 55.05 | 7386    | 4.42      | 9 | 58.05 | 2613    | 1.56      |

Mass spectrometry of compound 23.

Line#:1 R.Time:4.1(Scan#:495)  
 MassPeaks:245  
 RawMode:Single 4.1(495) BasePeak:77(55143)  
 BG Mode:None Group 1 - Event 1

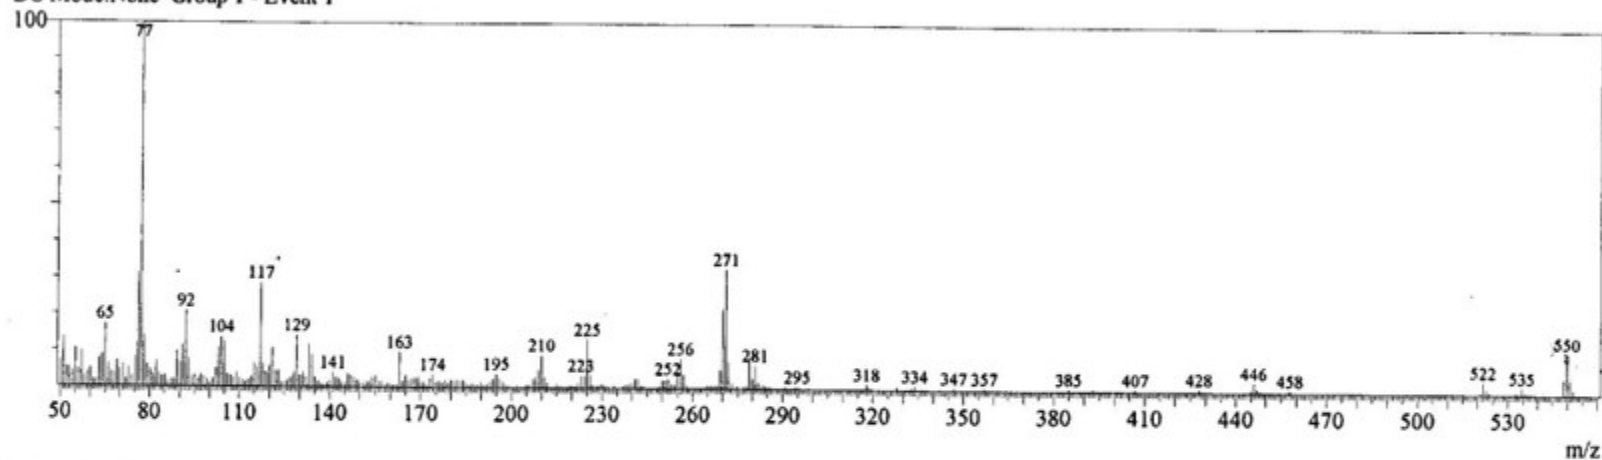

Mass Table

Line#:1 R.Time:4.1(Scan#:495)  
 MassPeaks:245  
 RawMode:Single 4.1(495) BasePeak:77(55143)  
 BG Mode:None Group 1 - Event 1

| # | m/z   | Abs. In | Rel. Int. | # | m/z   | Abs. In | Rel. Int. | # | m/z   | Abs. In | Rel. Int. |
|---|-------|---------|-----------|---|-------|---------|-----------|---|-------|---------|-----------|
| 1 | 50.05 | 3937    | 7.14      | 4 | 53.05 | 2886    | 5.23      | 7 | 56.05 | 2674    | 4.85      |
| 2 | 51.00 | 7417    | 13.45     | 5 | 54.05 | 2471    | 4.48      | 8 | 57.05 | 5387    | 9.77      |
| 3 | 52.05 | 2978    | 5.40      | 6 | 55.05 | 5769    | 10.46     | 9 | 58.05 | 1615    | 2.93      |

Mass spectrometry of compound 24.

Line#:1 R.Time:2.2(Scan#:268)  
 MassPeaks:218  
 RawMode:Single 2.2(268) BasePeak:77(35302)  
 BG Mode:None Group 1 - Event 1

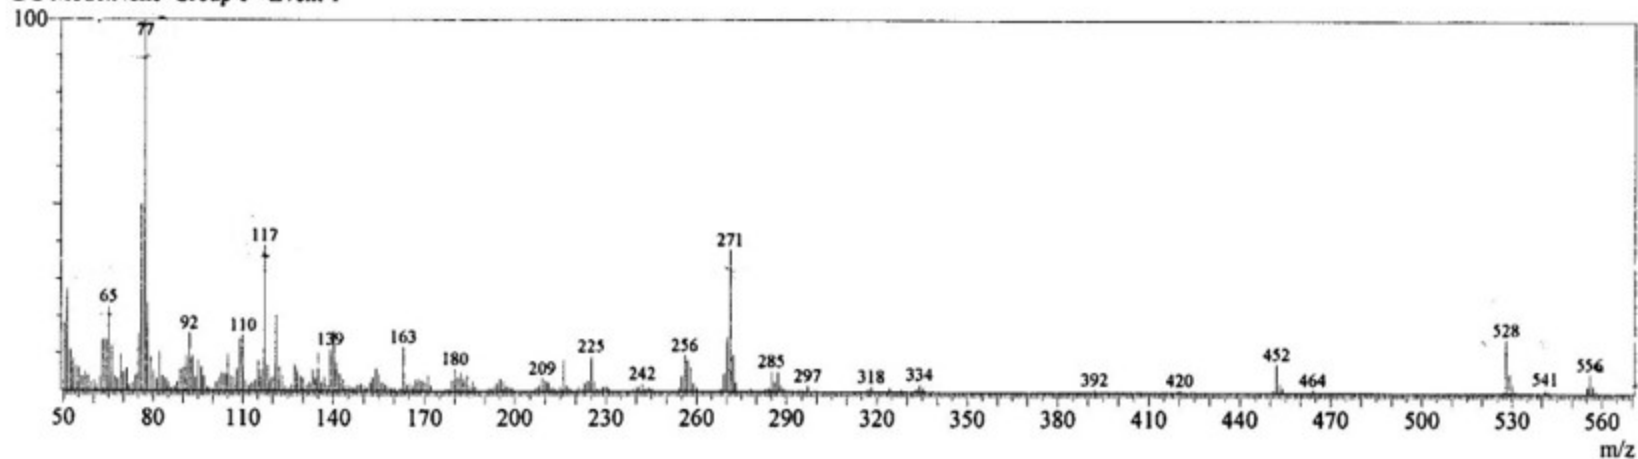

Mass Table

Line#:1 R.Time:2.2(Scan#:268)  
 MassPeaks:218  
 RawMode:Single 2.2(268) BasePeak:77(35302)  
 BG Mode:None Group 1 - Event 1

| # | m/z   | Abs. In | Rel. Int. | # | m/z   | Abs. In | Rel. Int. | # | m/z   | Abs. In | Rel. Int. |
|---|-------|---------|-----------|---|-------|---------|-----------|---|-------|---------|-----------|
| 1 | 50.05 | 6456    | 18.29     | 4 | 53.05 | 2993    | 8.48      | 7 | 56.10 | 1398    | 3.96      |
| 2 | 51.05 | 9674    | 27.40     | 5 | 54.05 | 2328    | 6.59      | 8 | 57.05 | 1777    | 5.03      |
| 3 | 52.10 | 3879    | 10.99     | 6 | 55.05 | 2291    | 6.49      | 9 | 58.00 | 1623    | 4.60      |

Mass spectrometry of compound 26.

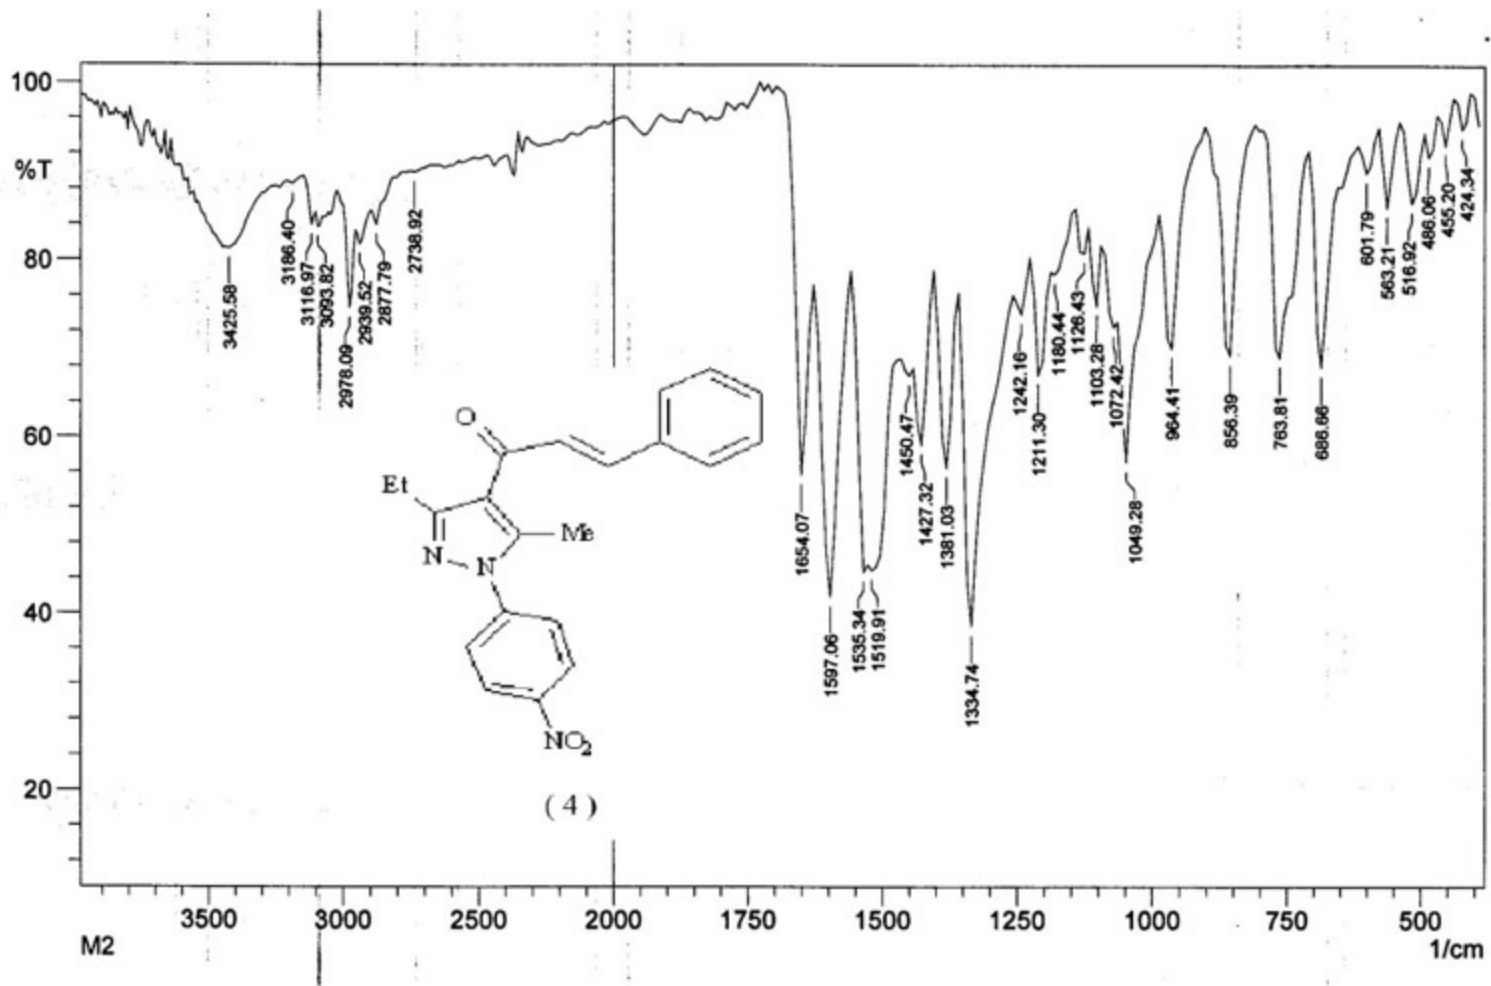

IR spectrum of compound 4.

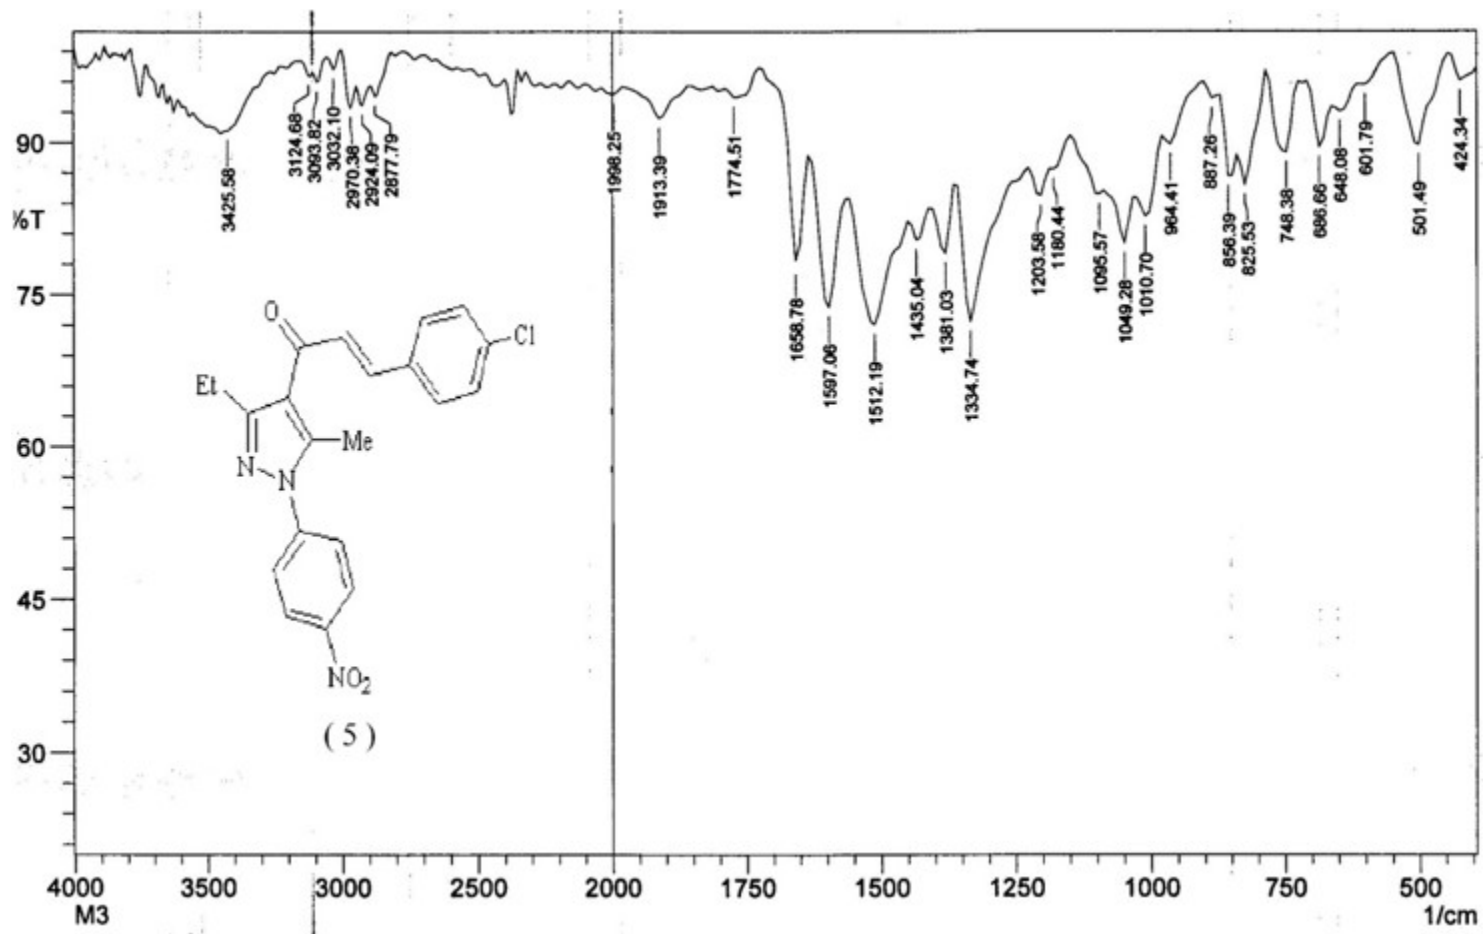

IR spectrum of compound 5.

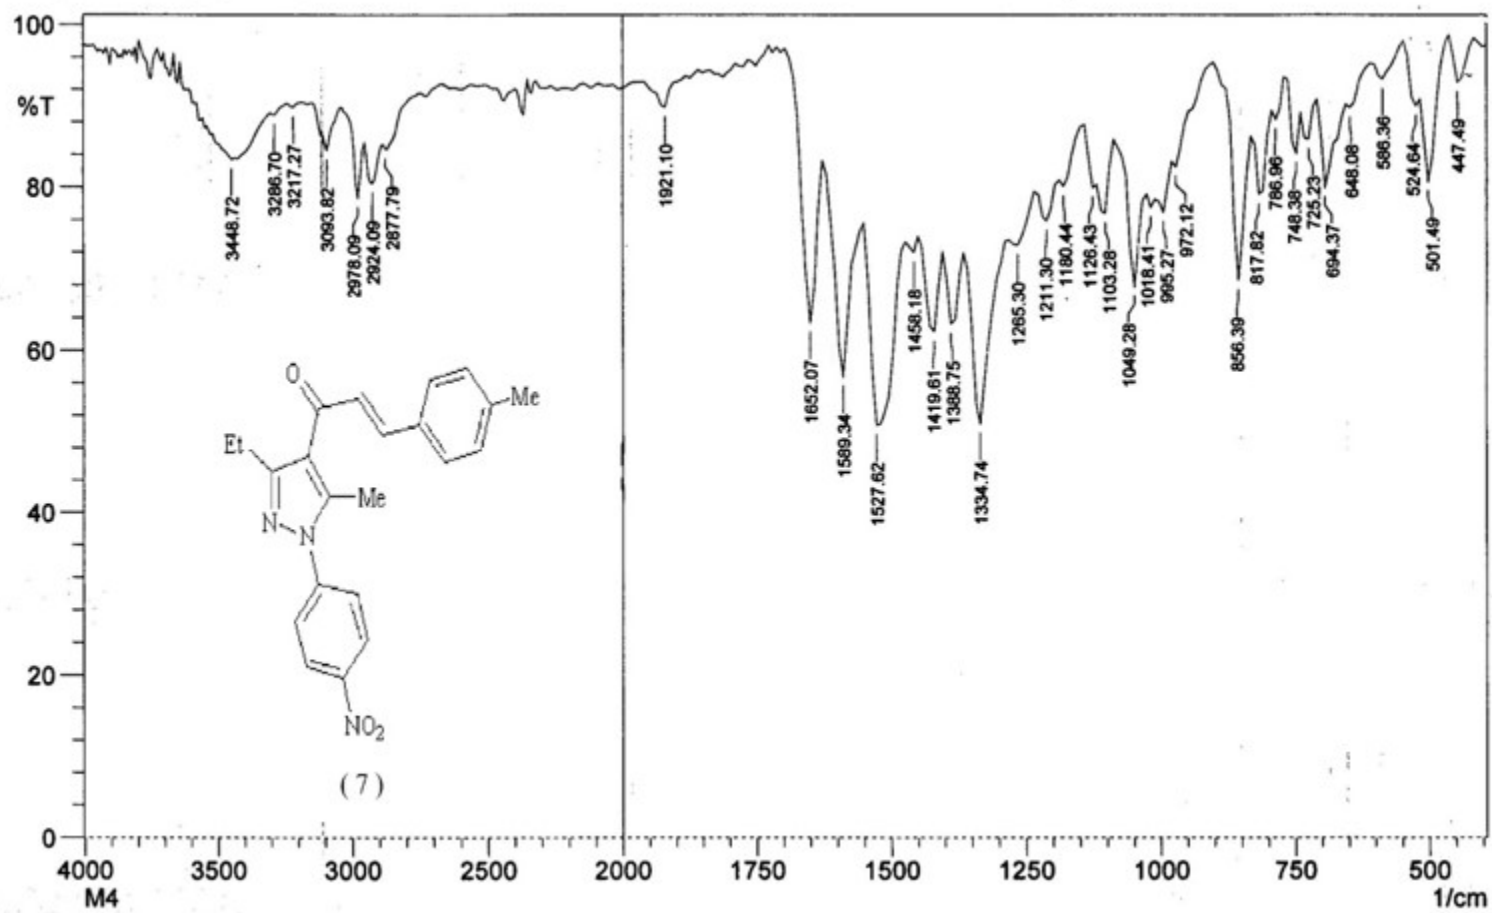

IR spectrum of compound 7.





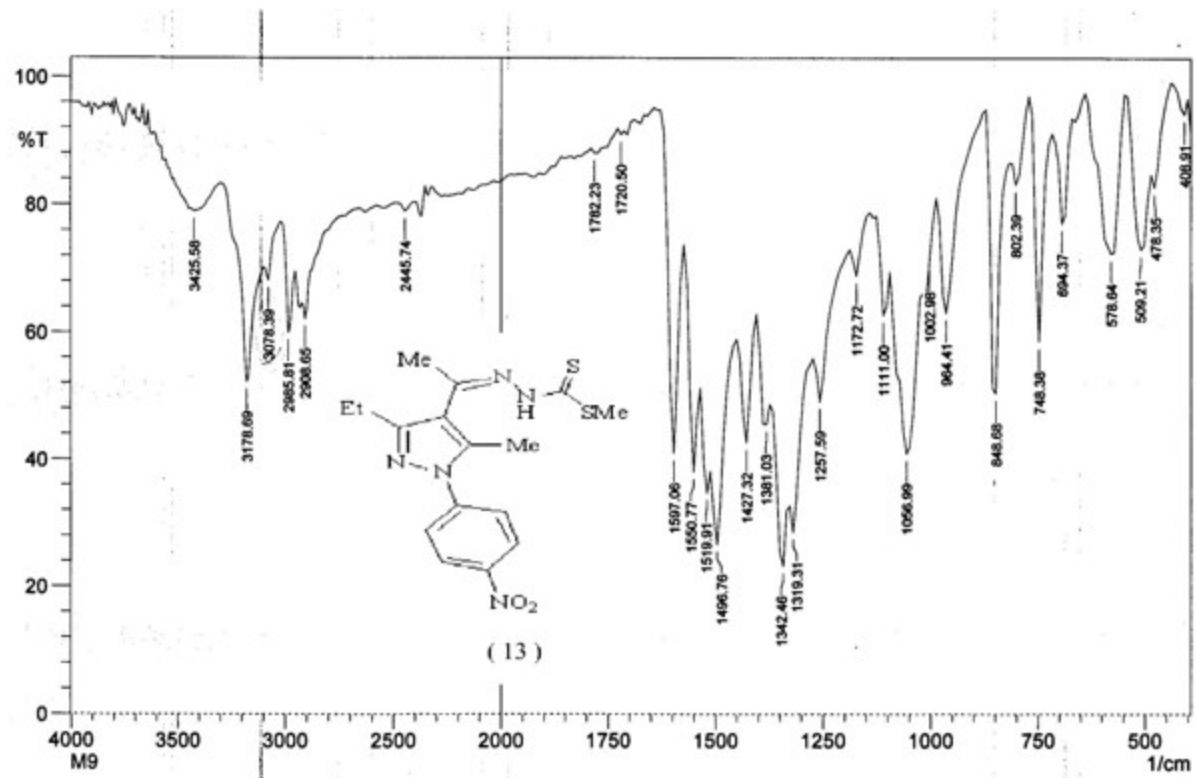

IR spectrum of compound 13.

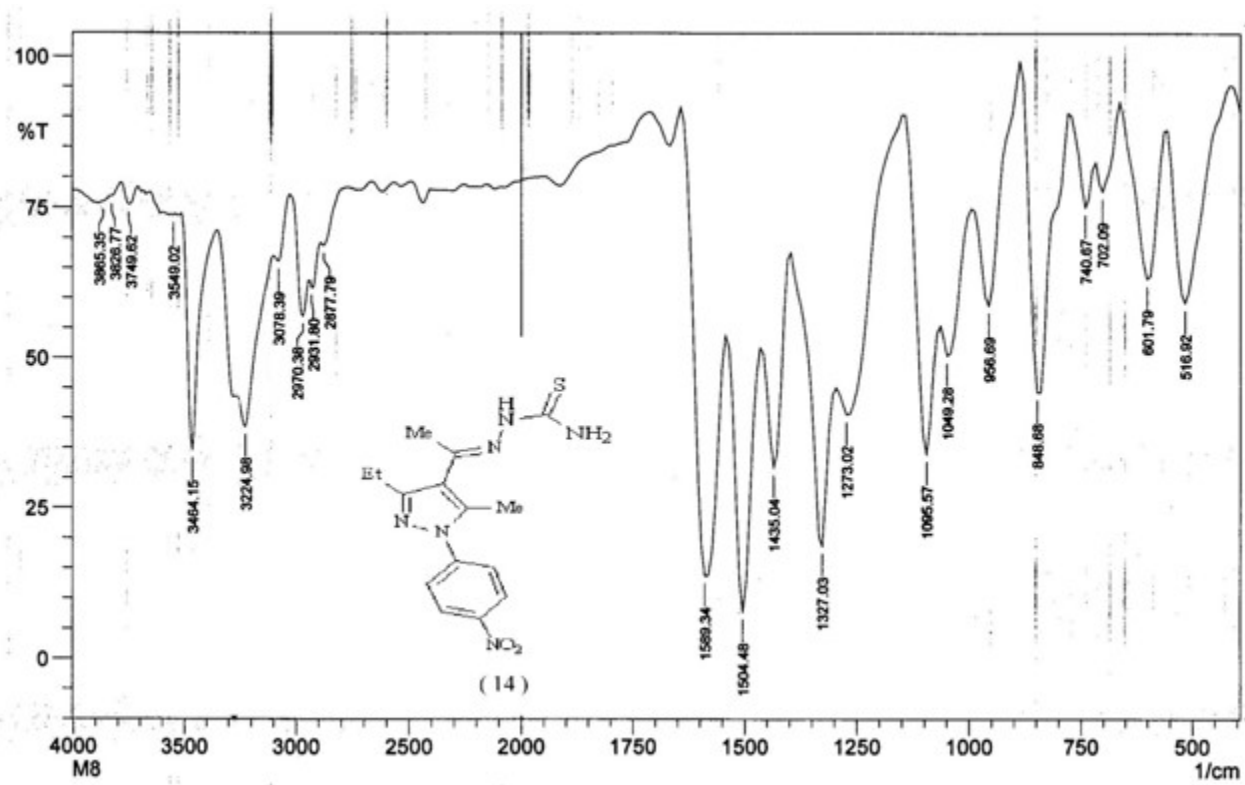

IR spectrum of compound 14.

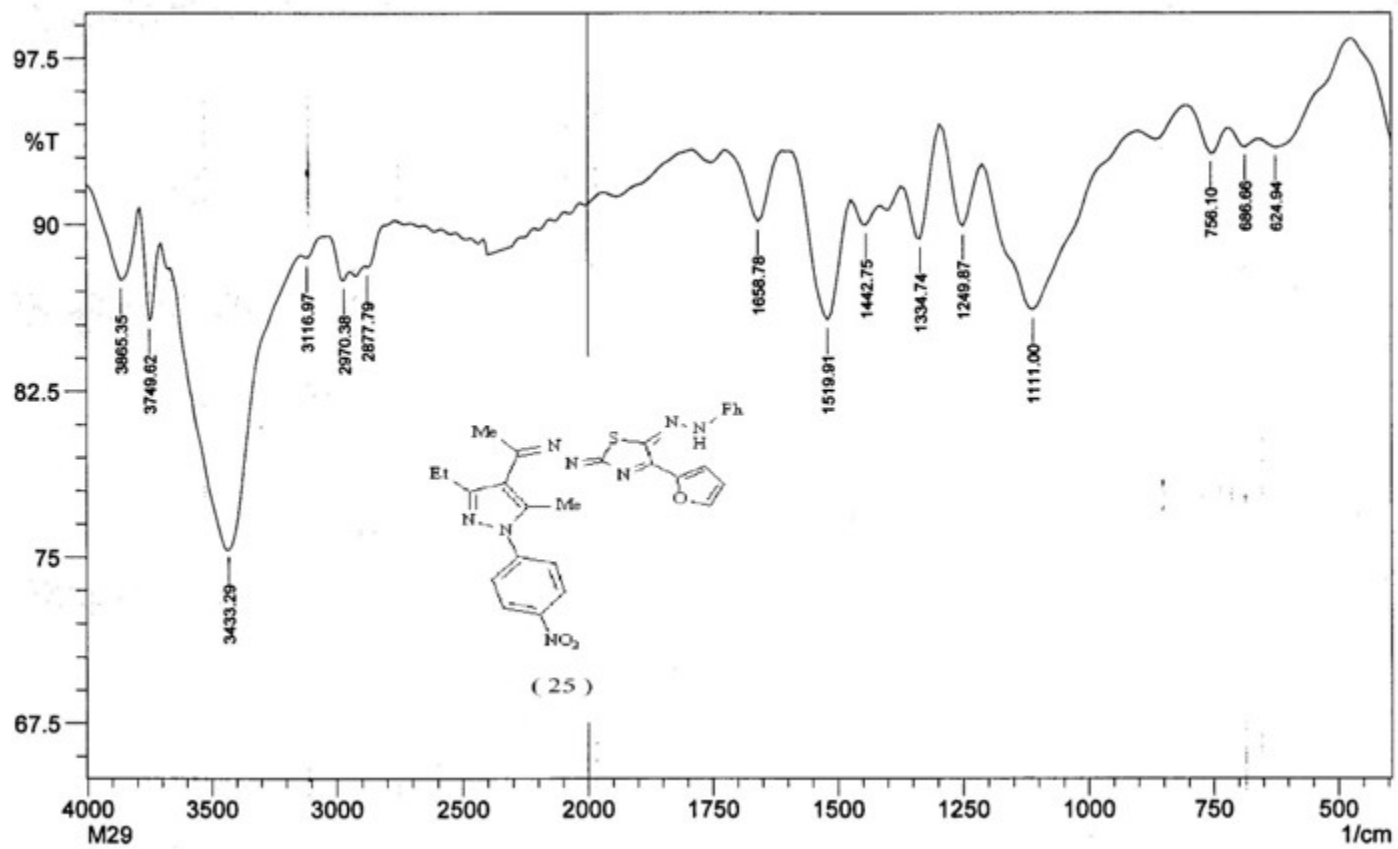

IR spectrum of compound 25.
